RESEARCH ARTICLE

# Anatomy and behavioral function of serotonin receptors in *Drosophila melanogaster* larvae

Annina Huser<sup>1</sup>, Melanie Eschment<sup>1</sup>, Nazli Güllü<sup>1</sup>, Katharina A. N. Collins<sup>1</sup>, Kathrin Böpple<sup>1</sup>, Lyubov Pankevych<sup>1</sup>, Emilia Roising<sup>1</sup>, Andreas S. Thum<sup>1,2,3\*</sup>

**1** Department of Biology, University of Konstanz, Konstanz, Germany, **2** Zukunftskolleg, University of Konstanz, Konstanz, Germany, **3** Department of Genetics, University of Leipzig, Leipzig, Germany

\* [andreas.thum@uni-leipzig.de](mailto:andreas.thum@uni-leipzig.de)

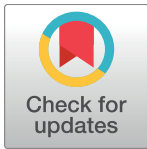

**OPEN ACCESS**

**Citation:** Huser A, Eschment M, Güllü N, Collins KAN, Böpple K, Pankevych L, et al. (2017) Anatomy and behavioral function of serotonin receptors in *Drosophila melanogaster* larvae. PLoS ONE 12(8): e0181865. <https://doi.org/10.1371/journal.pone.0181865>

**Editor:** Hiromu Tanimoto, Tohoku University, JAPAN

**Received:** February 20, 2017

**Accepted:** July 7, 2017

**Published:** August 4, 2017

**Copyright:** © 2017 Huser et al. This is an open access article distributed under the terms of the [Creative Commons Attribution License](https://creativecommons.org/licenses/by/4.0/), which permits unrestricted use, distribution, and reproduction in any medium, provided the original author and source are credited.

**Data Availability Statement:** All relevant data are within the paper and its Supporting Information files.

**Funding:** This work was supported by the Deutsche Forschungsgemeinschaft (TH1584/ 1-1 and TH1584/3-1 to A.S.T.), the Swiss National Science Foundation (31003A132812/1 to A.S.T.), the Baden Württemberg Stiftung (to A.S.T.), the Bioimaging Center and Zukunftkolleg of the University of Konstanz (to A.S.T.). A.H. is supported by the International Max Planck

## Abstract

The biogenic amine serotonin (5-HT) is an important neuroactive molecule in the central nervous system of the majority of animal phyla. 5-HT binds to specific G protein-coupled and ligand-gated ion receptors to regulate particular aspects of animal behavior. In *Drosophila*, as in many other insects this includes the regulation of locomotion and feeding. Due to its genetic amenability and neuronal simplicity the *Drosophila* larva has turned into a useful model for studying the anatomical and molecular basis of chemosensory behaviors. This is particularly true for the olfactory system, which is mostly described down to the synaptic level over the first three orders of neuronal information processing. Here we focus on the 5-HT receptor system of the *Drosophila* larva. In a bipartite approach consisting of anatomical and behavioral experiments we describe the distribution and the implications of individual 5-HT receptors on naïve and acquired chemosensory behaviors. Our data suggest that 5-HT<sub>1A</sub>, 5-HT<sub>1B</sub>, and 5-HT<sub>7</sub> are dispensable for larval naïve olfactory and gustatory choice behaviors as well as for appetitive and aversive associative olfactory learning and memory. In contrast, we show that 5-HT/5-HT<sub>2A</sub> signaling throughout development, but not as an acute neuronal function, affects associative olfactory learning and memory using high salt concentration as a negative unconditioned stimulus. These findings describe for the first time an involvement of 5-HT signaling in learning and memory in *Drosophila* larvae. In the longer run these results may uncover developmental, 5-HT dependent principles related to reinforcement processing possibly shared with adult *Drosophila* and other insects.

## Introduction

The biogenic amine serotonin (5-HT) exerts an essential role in a wide range of insect behaviors by its action as neurotransmitter, neuromodulator, and/or neurohormone (reviewed by [1]). Accordingly, for the adult fruit fly *Drosophila melanogaster* it was shown that 5-HT signaling is involved in chemosensation [2, 3], aggression [4, 5], mating [6], feeding [7, 8], and locomotion [7, 9].

As in vertebrates, 5-HT acts as natural ligand for a group of G protein-coupled receptors and ligand-gated ion channels found in the central and peripheral nervous systems [10–12].

Research School for Organismal Biology. The funders had no role in study design, data collection and analysis, decision to publish, or preparation of the manuscript.

**Competing interests:** The authors have declared that no competing interests exist.

5-HT receptors mediate both excitatory and inhibitory function. In the *Drosophila* genome five different 5-HT G protein-coupled receptors have been previously identified, called *5-HT<sub>1A</sub>*, *5-HT<sub>1B</sub>*, *5-HT<sub>2A</sub>*, *5-HT<sub>2B</sub>*, and *5-HT<sub>7</sub>* [13–18]. 5-HT receptor expression was found in distinct adult fly brain regions including the mushroom bodies (MB), central complex, optic lobes and antennal lobes (AL) [19–24]. Consequently, differential 5-HT receptor requirement was reported for aggression (*5-HT<sub>1A</sub>* and *5-HT<sub>2A</sub>*), sleep (*5-HT<sub>1A</sub>*), feeding (*5-HT<sub>1B</sub>* and *5-HT<sub>2A</sub>*), circadian entrainment and behavior (*5-HT<sub>1B</sub>* and *5-HT<sub>2A</sub>*), and courtship and mating (*5-HT<sub>7</sub>*) [8, 19–21, 23, 25, 26]. Moreover, 5-HT/5-HT receptor signaling was shown to be required for learning and memory as *5-HT<sub>1A</sub>*, *5-HT<sub>2A</sub>*, and *5-HT<sub>7</sub>* were reported to be involved in short and long term association [27]. Additionally, anesthesia-resistant memory formation was supposed to be mediated through *5-HT<sub>1A</sub>* receptors expressed in the mushroom body [28].

At the larval stage only a few studies have addressed the anatomical organization and functional relevance of 5-HT receptors. It was described that putative *5-HT<sub>1A</sub>*, *5-HT<sub>1B</sub>*, *5-HT<sub>2A</sub>*, and *5-HT<sub>7</sub>* positive cells can be found in the larval central nervous system (CNS) [19, 21, 23, 29]. This allows 5-HT to specifically regulate certain aspects of larval physiology and behavior. In detail, distinct larval 5-HT receptor function was reported for locomotion (*5-HT<sub>1A</sub>*, *5-HT<sub>1B</sub>*, *5-HT<sub>2A</sub>*, *5-HT<sub>2B</sub>*, and *5-HT<sub>7</sub>*), reduced light avoidance (*5-HT<sub>1A</sub>*), juvenile-to-adult transition (*5-HT<sub>7</sub>*), feeding (*5-HT<sub>2A</sub>*), and modulation of heart rate frequency (*5-HT<sub>2A</sub>* and *5-HT<sub>2B</sub>*) [13, 30–34].

However, these studies often focus on a single type of 5-HT receptor and thus miss a comprehensive side-by-side investigation of each receptor on the anatomical and behavioral level. Accordingly, one emphasis of this study was to investigate the organization of several different 5-HT receptors within the larval brain in parallel. To this end we used the *Gal4*-UAS system that allows for reproducible expression of effector genes in defined subsets of potential 5-HT receptor cells [35–37]. Based on the limitation of available *Gal4* lines we focused our analysis on four of the five 5-HT receptors: *5-HT<sub>1A</sub>-Gal4*, *5-HT<sub>1B</sub>-Gal4*, *5-HT<sub>2A</sub>-Gal4* (also often called *5-HT<sub>2Dro</sub>-Gal4* [21]), and *5-HT<sub>7</sub>-Gal4*. Please note that *5-HT<sub>2B</sub>* was only recently identified [13] and it is not part of this study. Thereby, we provide an initial analysis of larval 5-HT receptor system based on genetic tools that are state of the art and widely used in the field. We want to emphasize that it is not clear for all 5-HT receptor *Gal4* lines if and how reliable the *Gal4* expression reflects the endogenous receptor gene expression patterns. Due to technical limitations antibody and in-situ information is almost completely unavailable. Consequently, in the longer run, more sophisticated genetic tools have to be established and co-localization studies have to be performed.

Here, we applied a two-part approach by analyzing the expression patterns and the behavioral function of potential 5-HT receptor cells in *Drosophila* larvae. The behavioral assays include measurements for naïve olfactory and gustatory preferences performed via simple choice tests on agarose filled test plates [38]. In addition, a more advanced design allows to study associative olfactory learning and memory [39–47]. Presenting an odor (the conditioned stimulus (CS)) simultaneously with an aversive unconditioned stimulus (US) induces experience dependent avoidance of the CS. Conversely, if the same CS is paired with an appetitive US, animals can be trained to develop a preference for the CS. Thus, depending on previous experience, the same odor can trigger either avoidance or attraction [41]. Taken together, a comprehensive set of behavioral assays to analyze larval chemosensory behavior is at hand that allows investigating simple choice behavior and associative olfactory learning and memory in *Drosophila* larvae.

In an earlier study, we could show that 5-HT positive cells are *per se* neither necessary for naïve gustatory, olfactory, or light preferences nor for associative olfactory learning and

memory (using fructose and electric shock as positive and negative reinforcers, respectively) [48]. However, this does not exclude a specific contribution of distinct 5-HT receptors for chemosensory behaviors. Different 5-HT receptors act antagonistically. *5-HT<sub>7</sub>* was shown to activate adenylyl cyclases and increases cAMP levels, whereas *5-HT<sub>1A</sub>* and *5-HT<sub>1B</sub>* receptors inhibit cAMP production [14, 15, 18]. Thus, ablation of the entire 5-HT system can affect both assisting and inhibitory functions of antagonistic 5-HT receptors at the same time. We have therefore expanded our analysis on the role of 5-HT signaling on larval chemosensory behavior by focusing on distinct 5-HT receptor functions.

## Materials and methods

### Flies

Flies were maintained on standard *Drosophila* medium at 25°C or 19°C under 12h light /dark conditions. All 5-HT receptor specific lines, *5-HT<sub>1A</sub>-Gal4* [29], *5-HT<sub>1B</sub>-Gal4* [49] (Bloomington Stock Center no. 24240), *5-HT<sub>2A</sub>-Gal4* [21, 50] (Bloomington Stock Center no. 19367), *5-HT<sub>7</sub>-Gal4* [23], were kindly provided by Charles Nichols. Note that the *5-HT<sub>2A</sub>-Gal4* construct is an enhancer trap piggyBac construct in the *5-HT<sub>2A</sub>* locus that reduces its expression by nearly 90% [21]. *TRH-GAL4* [78] was kindly provided by Serge Birman. For behavioral experiments, wild type *Canton-S* (WT CS) flies and the effector lines *UAS-hid,rpr* [51, 52] and *UAS-shi<sup>ts</sup>* [53] (Bloomington Stock Center no. 44222) were used. *w<sup>1118</sup>* flies (kindly provided by Martin Heisenberg) were crossed with UAS- and *Gal4* lines to obtain heterozygous controls. To visualize the *Gal4* expression pattern, we used *UAS-mCD8::GFP* [54] (kindly provided by Hiromu Tanimoto) and *UAS-myr::tomato* [55, 56] (Bloomington Stock Center no. 32221). In all cases five to six day old feeding third instar larvae were used.

### Immunostaining

Experiments were performed as described before [57, 58]. Third instar larvae were put on ice and dissected in phosphate buffered saline (PBS). Brains were fixed in 3.6% formaldehyde (Merck, Darmstadt) in PBS for 30 min. After washing with PBT (PBS with 3% Triton-X 100, Sigma Aldrich, St. Louis, MO), brains were blocked with 5% normal goat serum (Vector Laboratories, Burlingame, CA) in PBT for one to two hours and then incubated for two days with first antibodies at 4°C. Before applying the secondary antibodies for one or two days at 4°C, brains were washed with PBT. Finally, brains were again washed, mounted in Vectashield (Vector Laboratories) between two cover slips and stored at 4°C in darkness. This protocol was used for data presented in Figs 1A, 1A<sub>I</sub>, 1A<sub>II</sub>, 1B, 1B<sub>I</sub>, 1B<sub>VI</sub>, 1C, 1C<sub>IV</sub> and 2.

In addition we used a second protocol developed at the HHMI Janelia research campus (<https://www.janelia.org/project-team/flylight/protocols>). Larval tissues were dissected, fixed and washed as described above. After blocking with 3% normal goat serum (Vector Laboratories, Burlingame, CA) in PBT for 1 hr, tissues were incubated for two days with first antibodies at 4°C. After multiple rinses in PBT, tissues were incubated 2 days at 4°C in the cocktail of secondary antibodies. Nervous systems were then washed two to three times in PBT, mounted on poly-L-lysine (Sigma-Aldrich) coated coverslips and then transferred to a coverslip staining jar (Electron Microscopy Sciences) to dehydrate through a graded ethanol series. Afterwards tissues were cleared in xylene, and mounted in DPX (Sigma). This protocol was used for data presented in Fig 1A<sub>III</sub>–1A<sub>VII</sub>, 1B<sub>II</sub>–1B<sub>V</sub>, 1B<sub>VII</sub>, 1C<sub>I</sub>–1C<sub>III</sub>, 1C<sub>V</sub> and 1D<sub>VII</sub>.

Images were taken with Zeiss confocal laser microscopes LSM 550 and LSM 780. The resulting image stacks were projected and analyzed with ImageJ (NIH; <https://imagej.nih.gov/ij/>) software. Contrast and brightness adjustment as well as rotation and organization of images were performed in Photoshop (Adobe Systems Inc., San Jose, CA).

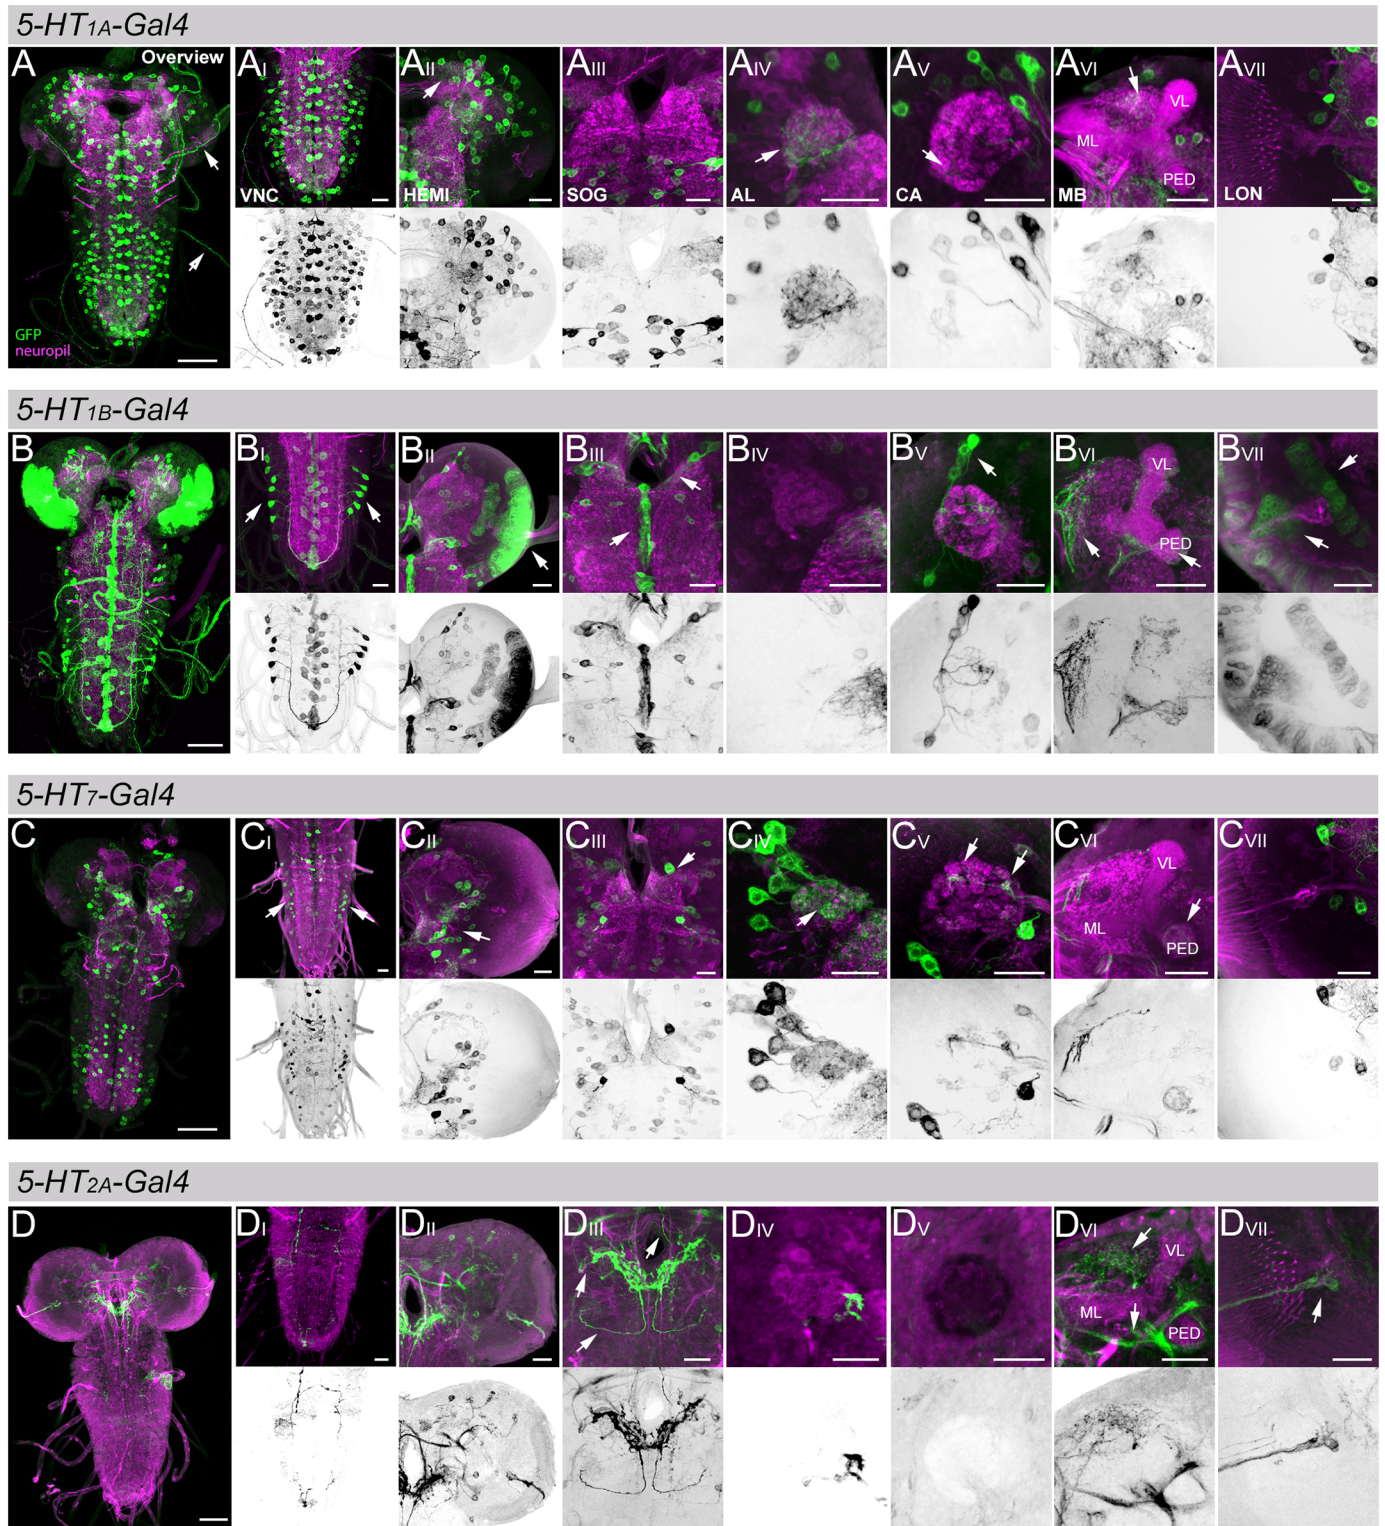

**Fig 1. Gal4 expression patterns of four potential 5-HT receptor lines.** *5-HT<sub>1A</sub>*, *5-HT<sub>1B</sub>*, *5-HT<sub>7</sub>*, and *5-HT<sub>2A</sub>*-Gal4 positive cells are shown in A, B, C, and D, respectively. (A-C) Gal4 lines were crossed with UAS-*mCD8::GFP* to analyze their expression patterns (green; anti-GFP staining) in addition to reference labeling of the central nervous system (CNS) (magenta; anti-ChAT/anti-FasII double-staining). In (D) *5-HT<sub>2A</sub>*-Gal4 was crossed with UAS-*myr::tomato* to visualize its expression pattern (green; anti-dsRed staining) within the larval CNS (magenta; anti-ChAT/anti-FasII double-staining). For all four lines the first column shows a frontal view onto a z-projection of the entire CNS. In addition, for each line representative z-projections of close-ups of the ventral nerve cord (VNC), one hemisphere (HEMI), the subesophageal ganglion (SOG), one antennal lobe (AL), the calyx (CA) of the mushroom body (MB), the lobes of the MB, and the larval optic neuropil (LON) are shown from left to right. Below each close-up only the GFP channel

is shown as an inverted black and white image to visualize innervation patterns with higher contrast and no neuropil background. White arrows highlight aspects of the expression patterns that are further described in the results. Additional abbreviations: VL vertical lobe, ML medial lobe, PED peduncle; Scale bars: 50  $\mu\text{m}$  (in A, B, C, D) and 20  $\mu\text{m}$  (in all other panels).

<https://doi.org/10.1371/journal.pone.0181865.g001>

## Immunofluorescence antibodies

Anti-GFP (polyclonal/rabbit/A6455/Molecular Probes/1:1000), anti-GFP-FITC (polyclonal/goat/ ab6662/abcam/1:1000) and anti-DsRed (polyclonal/rabbit/632496/Clontech/1:200) were used for visualizing *Gal4* lines expression patterns. Two different mouse antibodies for staining the neuropil (anti-ChAT (monoclonal/mouse/ChAT4B1/DSHB/1:100)) and the axonal tracts (anti-Fasciclin II (monoclonal/1d4 anti-Fas/DSHB/1:50)) were applied to provide landmarks within the larval CNS. 5-HT cells were visualized with anti-5-HT (polyclonal/rabbit/S5545/Sigma Aldrich /1:1000), dopaminergic cells with anti-TH (monoclonal/mouse/22941/Immuno-Star/1:500), respectively.

As secondary antibodies goat anti-rabbit IgG Alexa Fluor 488 (polyclonal/A11008/Molecular Probes/ 1:200), goat anti-mouse IgG Alexa Fluor 647 (polyclonal/A21235/Molecular Probes/1:200), goat anti-mouse IgG Alexa Fluor 405 (polyclonal/A31553/Molecular Probes/ 1:200), goat anti-mouse IgG Cy3 (polyclonal/A10521/Molecular Probes/1:200), and goat anti-rabbit IgG Cy5 (polyclonal/A10523/Molecular Probes/1:200) were used.

## Behavioral experiments

Five to six day old feeding third instar larvae were used for all behavioral experiments. The assays were performed either at 22°C or at 35°C using UAS-*hid,rpr* and UAS-*shi<sup>ts</sup>* effector lines, respectively. In case of UAS-*shi<sup>ts</sup>*, larvae were additionally incubated for 2 min in a water bath at 37°C prior to behavioral experiments. For further details on experimental protocols we added the following description and refer to earlier studies [38–40, 43, 57, 59–62].

## Associative olfactory learning and memory

Experiments were conducted on test plates filled with a thin layer of 2.5% agarose containing either pure agarose or agarose plus reinforcer. We used 1.5 M sodium chloride (SALT) and 2.0 M D-fructose (FRU). As olfactory stimuli, we used 10  $\mu\text{l}$  amyl acetate (AM, diluted 1:250 in paraffin oil) and benzaldehyde (BA, undiluted). Odorants were loaded into custom-made Teflon containers with perforated lids. Learning and memory were tested by exposing a first group of 30 animals to BA, while crawling on agarose medium containing sugar as a positive reinforcer or high salt concentration as a negative reinforcer. After 5 min, larvae were transferred to a fresh test plate in which they were allowed to crawl on pure agarose medium for 5 min while being exposed to AM. A second group of larvae received the reciprocal training. Immediately, after three training cycles, larvae were transferred onto test plates on which AM and BA were presented on opposite sides. Please note that for aversive olfactory learning and memory the test plate included the same high salt concentration as respective training plates. After 5 min, individuals were counted on the AM side (#AM), the BA side (#BA), and in a neutral zone. By subtracting the number of larvae on the BA side from the number of larvae on the AM side divided by the total number of counted individuals (#TOTAL), we calculated a preference index for each training group:

$$\text{PREF}_{\text{AM+}/\text{BA}} = (\# \text{ AM} - \# \text{ BA}) / \# \text{ TOTAL} \quad (1a)$$

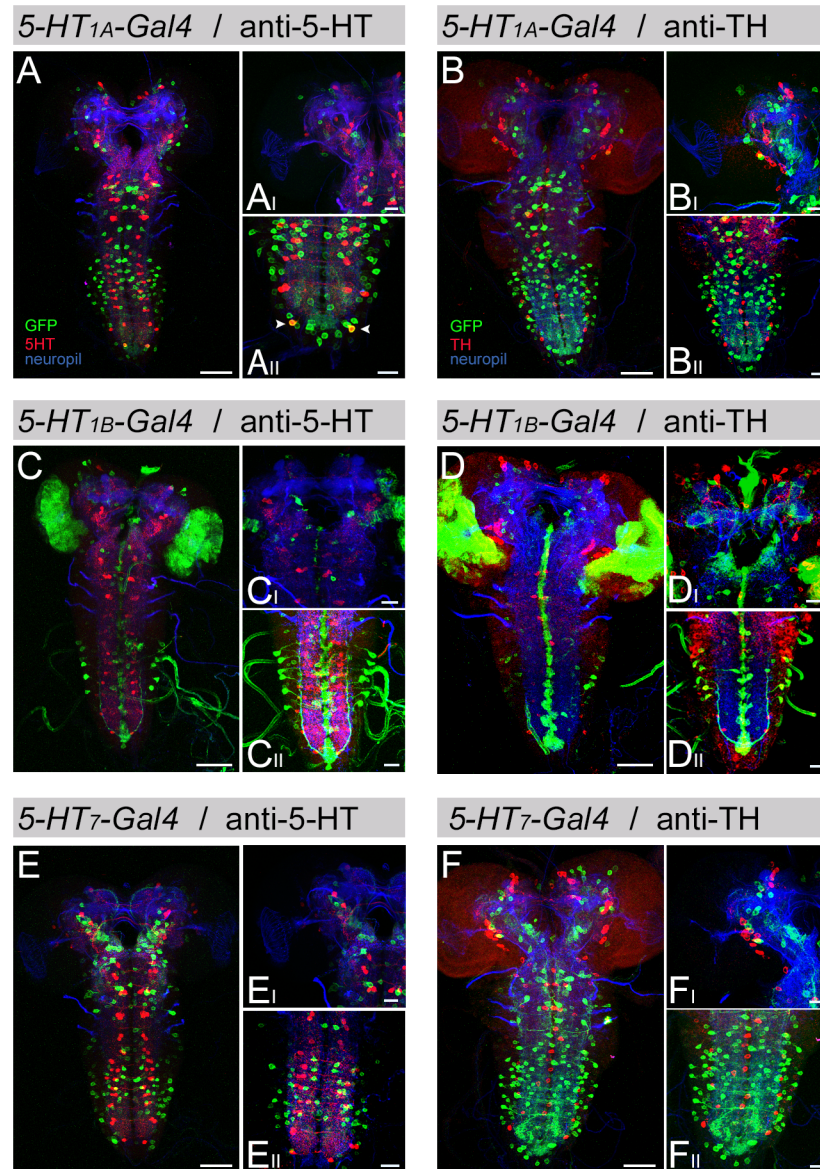

**Fig 2. Co-expression of *5-HT<sub>1A</sub>*, *5-HT<sub>1B</sub>*, and *5-HT<sub>7</sub>* Gal4 with anti-5-HT and anti-TH.** Expression patterns of *5-HT<sub>1A</sub>*, *5-HT<sub>1B</sub>*, and *5-HT<sub>7</sub>* Gal4 crossed with UAS-*mCD8::GFP* are visualized using a triple staining protocol. Anti-GFP (green) was used to label Gal4 positive cells, anti-ChAT/anti-FasII (blue) was used as a reference labeling for the CNS, and anti-5-HT (red, in A, C, E) or anti-TH (red, in B, D, F) was used to identify 5-HT or dopaminergic cells, respectively. *5-HT<sub>2A</sub>* Gal4 was not included in this experiment due to the low number of cell bodies inside the CNS (Fig 1D). There was no co-staining detected between 5-HT receptor Gal4 expression patterns and anti-TH (B, D, F). The same is true for the co-expression analysis with anti-5-HT (A, C, E); the only exception was a single pair of neurons in the terminal segment of the VNC labeled by *5-HT<sub>1A</sub>* Gal4 (arrowhead in A<sub>ii</sub>). (A-F) show frontal views onto z-projections of the entire CNS (left) and representative z-projections of close-ups of one or both hemispheres and SOG (right top) and abdominal ganglion (right bottom). Scale bars: 50 μm (left) and 20 μm (right top and bottom).

<https://doi.org/10.1371/journal.pone.0181865.g002>

$$\text{PREF}_{\text{AM/BA}^+} = (\# \text{ AM} - \# \text{ BA}) / \# \text{ TOTAL} \quad (1b)$$

To measure specifically the effect of associative learning and memory we calculated the associative performance index (PI) as the difference in preference between the reciprocally

trained larvae:

$$PI = (\text{PREF}_{\text{AM+}/\text{BA}} - \text{PREF}_{\text{AM}/\text{BA+}}) / 2 \quad (2)$$

Negative PIs thus represent aversive olfactory learning and memory, whereas positive PIs indicate appetitive olfactory learning and memory. Division by 2 ensures scores are bound within (-1; 1).

## Chemosensory preference

For gustatory preference tests, 2.5% agarose (Sigma Aldrich Cat. No.: A5093, CAS No.: 9012-36-6) solution was boiled in a microwave oven and filled as a thin layer into test plates (85 mm diameter, Cat. No.: 82.1472, Sarstedt, Nümbrecht). After cooling, the agarose was removed from half of the plate. The empty half was filled with 2.5% agarose solution containing sodium chloride (SALT, Sigma Aldrich Cat. No.: S7653, CAS No.: 7647-14-5; 2.0 M and 1.5 M) and D-fructose (FRU, Sigma Aldrich Cat. No.: 47740, CAS No.: 57-48-7; 2.0 M). Assay plates were used at the same day shortly after preparation to avoid diffusion of the stimuli from one side to the other. Groups of 30 larvae were placed in the middle of the plate, allowed to crawl for 5 min, and then counted on the stimulus containing side, the agarose only side, and a neutral zone. The neutral zone covers 1 cm from top to bottom of the Petri dish between the left and right sides. It thereby separates both halves and covers the transition from pure agarose to agarose plus gustatory stimulus. By subtracting the number of larvae on the pure agarose side (#nS) from the number of larvae on the stimulus side (#S) divided by the total number of counted larvae (#TOTAL), a preference index for the respective chemosensory stimulus was calculated:

$$\text{PREF} = (\# S - \# nS) / \# \text{TOTAL}$$

Negative PREF values indicate avoidance, whereas positive PREF values represent attractiveness.

For olfactory preference tests, a similar assay was used except that olfactory stimuli were presented in custom-made Teflon containers with perforated lids presented on only pure agarose containing test plates. As olfactory stimuli amyl acetate (AM, Fluka Cat. No.: 46022; CAS No.: 628-63-7; diluted 1:250 in paraffin oil, Fluka Cat. No.: 76235, CAS No.: 8012-95-1) and benzaldehyde (BA, Fluka Cat. No.: 12010, CAS No.: 100-52-7; undiluted) were used.

## Acutely blocking synaptic output with *shibire<sup>ts</sup>*

To acutely block synaptic output of defined sets of cells we used UAS-*shi<sup>ts1</sup>* [53]. Immediately before the experiment, larvae were incubated for 2 min in a water-bath at 37°C. The behavioral experiments were then performed as described before, at a restrictive temperature of about 35°C in a custom made chamber.

## Statistical methods

Statistical analysis and visualizations were done with R (version 2.15.2), R studio (version 0.98.1028) and Adobe Photoshop (version CC 2015.5). Behavioral data are visualized as box plots with medians (middle lines), 25% / 75% percentiles (box boundaries), and 10% / 90% percentiles (whiskers). Sample size in each case is  $n = 10-20$ . Kruskal-Wallis tests (KWT) were performed and, in case of significance, followed by Wilcoxon rank-sum tests (WRT); Bonferroni corrections were used for multiple comparisons as applicable (indicated with BWRT). Likewise, Wilcoxon signed-ranked tests (WST) were used to compare values against

chance level. Visualization of statistical evaluations: if only n.s. is shown the initial KWT did not suggest for a difference between the three groups ( $p \geq 0.05$ ). When differences between each group are shown this provides the results of the BWRT as the initial KWT suggested for significance ( $p < 0.05$ ). P values were rounded to three decimal places except for cases that would have resulted in zero. Here additional decimal places are given. Further details including raw data can be found in [S1 Table](#).

## Results

### Expression patterns of four specific 5-HT receptor *Gal4* lines in the larval brain

To analyze the cellular anatomy of different 5-HT receptor *Gal4* lines in the CNS of third instar larvae of *Drosophila*, we crossed *5-HT<sub>1A</sub>-Gal4*, *5-HT<sub>1B</sub>-Gal4*, and *5-HT<sub>7</sub>-Gal4* with *UAS-mCD8::GFP*. We used an anti-GFP antibody to identify details of the cellular innervation and morphology and anti-Fasciclin II (FasII) / anti-Choline Acetyltransferase (ChAT) background staining ([Fig 1](#)), which label axonal tracts [63] and neuropils [64], respectively. The double labeling approach thus allows us to map the different 5-HT receptor *Gal4* expression patterns into a common neuropil reference. This approach was hitherto not applied to all of these lines at the larval stage. Please note, to clearly disentangle *5HT<sub>2A</sub>-Gal4* dependent expression from marker expression we crossed *5-HT<sub>2A</sub>-Gal4* with *UAS-myr::tomato* and labelled specifically *Gal4* positive cells via an anti-DsRed antibody [65]. This is necessary as the enhancer trap piggyBac construct carries a “3xP3-EYFP” marker that is also recognized by the anti-GFP antibody [50, 66, 67]. The “3xP3-EYFP” marker is expressed under the control of the endogenous *Pax6* gene and thus on its own drives expression in the larval visual system and brain [68, 69].

**5-HT<sub>1A</sub>-Gal4.** *5-HT<sub>1A</sub>-Gal4* expression was found throughout the larval CNS including both brain hemispheres and the ventral nerve cord (VNC) ([Fig 1A](#)). A closer inspection revealed innervation of the protocerebrum (arrow in [Fig 1A<sub>II</sub>](#) and [1A<sub>V</sub>](#)), the AL (arrow in [Fig 1A<sub>IV</sub>](#)), to a lesser degree of the suboesophageal ganglion (SOG; [Fig 1A<sub>III</sub>](#)), and mushroom body calyx (CA; arrow in [Fig 1A<sub>V</sub>](#)). In contrast, the MB lobes and larval optic neuropil (LON) were not labeled ([Fig 1A<sub>VI</sub>](#) and [1A<sub>VII</sub>](#)). Characteristic for the *5-HT<sub>1A</sub>-Gal4* expression pattern was a row of cell bodies localized close to the midline in each thoracic and abdominal segment, ([Fig 1A](#) and [1A<sub>I</sub>](#)) as well as a set of about 15 cell bodies dorsolateral of the CA innervating different protocerebral regions ([Fig 1A<sub>V</sub>](#)). In addition, several neurons were labeled per thoracic and abdominal segment that leave the brain and potentially target the peripheral system of the larvae (arrows in [Fig 1A](#)). The obtained expression pattern is comparable to the ones described before [15, 29].

**5-HT<sub>1B</sub>-Gal4.** *5-HT<sub>1B</sub>-Gal4* also showed expression in extended regions throughout the whole larval CNS, including both hemispheres and the VNC ([Fig 1B](#)). A closer inspection revealed innervation in cells at the tip and midline of the SOG (arrows in [1B<sub>III</sub>](#)). A small number of only about 20, likely embryonic-born Kenyon cells (KC) [70], innervate the entire MB at the CA and at the surface of the MB peduncle, vertical and medial lobe (arrows in [Fig 1B<sub>V</sub>](#) and [1B<sub>VI</sub>](#)). No expression was found in the AL and LON ([Fig 1B<sub>IV</sub>](#) and [1B<sub>VII</sub>](#)). Besides the pronounced staining along the midline, a set of cells with somata in the lateral abdominal segments project to the terminal plexus of the VNC (arrows in [Fig 1B<sub>I</sub>](#)). These *5-HT<sub>1B</sub>* positive cells were reported to express the peptide hormone leucokinin and play a role in larval turning behavior [71]. An additional characteristic of the *5-HT<sub>1B</sub>-Gal4* line is its massive expression laterally in both hemispheres that give rise to the adult optic lobes after metamorphosis (arrows in [Fig 1B<sub>II</sub>](#) and [1B<sub>VII</sub>](#)) [72]. Our results are in line with earlier findings of the expression patterns of *5-HT<sub>1B</sub>* [19, 71].



**5-HT<sub>7</sub>-Gal4.** *5-HT<sub>7</sub>-Gal4* expression was detected throughout the whole larval CNS including both hemispheres and the VNC (Fig 1C). We could not find innervation within the MB lobes and the LON by potential 5-HT<sub>7</sub> cells (Fig 1C<sub>VI</sub> and 1C<sub>VII</sub>). Yet, innervation was detected in the VNC, SOG, AL and CA (arrows in Fig 1C<sub>I–I</sub>C<sub>V</sub>). Seven cells with somata in close proximity to the AL densely innervate the AL (Fig 1C<sub>IV</sub>). These are likely projection neurons as they follow the antennocerebral tract and innervate the CA (arrows in Fig 1C<sub>V</sub>). The peduncle of the MB was weakly innervated by a MB extrinsic neuron called BL neuron (right arrow in Fig 1C<sub>VI</sub>) [70]. In addition, *5-HT<sub>7</sub>-Gal4* shows dense innervation within the SOG potentially co-localizing with the 5-HT positive SE0 clusters [34, 48, 73]. These cells were reported to be involved in feeding and also in linking the external environment with the internal endocrine system [34, 73]. Overall, the observed expression is consistent with the one reported before [23].

**5-HT<sub>2A</sub>-Gal4.** *5-HT<sub>2A</sub>-Gal4* showed an expression pattern that is remarkably different when compared to the other three driver lines (Fig 1D). There are nearly no somata detectable within the larval CNS (Fig 1D<sub>I–D</sub>VII). Yet, there is strong labelling within the SOG, likely by axonal terminals from neurons of the peripheral nervous system that enter the brain via different nerves (arrows in Fig 1D<sub>III</sub>). However, due to technical limitations we were not able to clearly localize these cells outside of the CNS. We are nonetheless convinced that these cells are *5-HT<sub>2A</sub>-Gal4* positive due to their initial description by Nichols [21] using the same *Gal4* line. In addition, we found a second type of brain innervation from the periphery, this time into the LON (arrow in Fig 1D<sub>VII</sub>). Please note that the larval MB was not innervated. Detectable staining was limited to adjacent fiber bundles (lower arrow in Fig 1D<sub>VI</sub>) and weak innervation of the dorsal protocerebrum (upper arrow in Fig 1D<sub>VI</sub>).

In summary, the four analyzed *Gal4* expression patterns suggest that 5-HT receptors may be expressed broadly throughout the brain in partially overlapping patterns including primary olfactory and gustatory brain centers (AL and SOG). Distinct receptors may be limited to particular types of cells like peripheral sensory neurons that project to the SOG (*5-HT<sub>2A</sub>-Gal4*) and MB Kenyon cells that are known to be involved in learning and memory (*5-HT<sub>1B</sub>-Gal4*). Yet, these results are based on *Gal4* expression patterns that may not represent the endogenous gene expression patterns and therefore have to be handled with care.

## Co-localization of 5-HT receptor *Gal4* lines with serotonin and Tyrosine-Hydroxylase

To examine if the larval 5-HT system is controlled in an auto-regulatory manner [74–76], we crossed *5-HT<sub>1A</sub><sup>-</sup>*, *5-HT<sub>1B</sub><sup>-</sup>*, and *5-HT<sub>7</sub>-Gal4* with *UAS-mCD8::GPF*, used the same primary antibody mixture as before (anti-ChAT/anti-FasII and anti-GPF), but added anti-5-HT (Fig 2A, 2C and 2E). We did not analyze *5-HT<sub>2A</sub>-Gal4* due to the low number of stained somata within the larval brain (Fig 1D), but rather afferent projections of peripheral neurons that have their somata outside the CNS. All three driver lines exhibited no co-labeling of *Gal4* positive and anti-5-HT staining (Fig 2A, 2C and 2E). This indicates that 5-HT receptors may localize mostly postsynaptically in the larva. This interpretation matches with earlier results that have analyzed 5-HT/5-HT receptor co-localization [23, 29]. Yet, we also found one exception: consistent with previous work [29] a single pair of *5-HT<sub>1A</sub>* stained cells in the VNC co-localized with 5-HT immunolabeling (Fig 2A<sub>II</sub>, arrowheads).

In addition, we also analyzed if potential 5-HT receptor cells are dopaminergic. It was shown that different aminergic systems directly connect on each other. Octopaminergic neurons for example signal a specific aspect of sugar reinforcement directly onto dopaminergic neurons that express an  $\alpha$ -adrenergic-like octopamine receptor called *OAMB* [77]. To address

if the larval serotonergic system can directly act on dopaminergic neurons we applied a triple staining approach. We used anti-TH for the visualization of dopaminergic neurons, anti-GFP to label 5-HT receptor positive cells and anti-ChAT/anti-FasII for a reference staining of the larval CNS (Fig 2B, 2D and 2F). For the tested lines, *5-HT<sub>1A</sub><sup>-</sup>*, *5-HT<sub>1B</sub><sup>-</sup>*, and *5-HT<sub>7</sub>-Gal4*, we did not detect co-localization with dopamine synthesizing cells. Therefore, it is rather unlikely that the 5-HT system directly signals as a neurotransmitter on dopaminergic neurons.

### Ablation of *5-HT<sub>2A</sub>-Gal4* positive cells during development impairs aversive associative olfactory learning and memory

To examine if larvae lacking potential 5-HT receptor cells are able to associate an odor with a positive or negative gustatory stimulus, we utilized a well-established standard paradigm (reviewed in [38]). As olfactory stimuli we used benzaldehyde (BA) and amyl acetate (AM). As appetitive and aversive gustatory unconditioned stimuli we used fructose (FRU, 2.0 M) and high sodium chloride concentration (SALT, 1.5 M), respectively. This is possible, because ablation of potential 5-HT receptor cells did neither change naïve olfactory responses towards amyl acetate (diluted 1:250 in paraffin oil), benzaldehyde (undiluted), heptanol (undiluted), and nonanol (undiluted) (S1 Fig); nor gustatory responses to sodium chloride (2M and 1.5M for *5-HT<sub>2A</sub>-Gal4*), fructose (2M), arabinose (2M), and sorbitol (2M) (S2 and S3 Figs).

Ablation of *5-HT<sub>1A</sub>-Gal4*, *5-HT<sub>1B</sub>-Gal4*, and *5-HT<sub>7</sub>-Gal4* positive cells throughout development did not change appetitive olfactory learning and memory (Fig 3B, KWT  $p = 0.061$ ; Fig 3C, KWT  $p = 0.007$ ; BWRT  $p = 0.189$  compared to *5-HT<sub>1B</sub>-Gal4/+* and  $p = 0.052$  compared to *UAS-hid,rpr/+*; Fig 3D, KWT  $p = 0.061$ ) as well as aversive olfactory learning and memory (Fig 3E, KWT  $p = 0.233$ ; Fig 3G, KWT  $p = 0.006$ ; BWRT  $p = 1.000$  compared to *5-HT<sub>1B</sub>-Gal4/+* and  $p = 0.016$  compared to *UAS-hid,rpr/+*; Fig 3H, KWT  $p = 0.303$ ).

Yet, *5-HT<sub>2A</sub>-Gal4/UAS-hid,rpr* experimental larvae showed impaired aversive olfactory learning and memory (Fig 3I; WST  $p = 0.131$ ), which was significantly different compared to both genetic controls (Fig 3I; KWT  $p = 0.010$ ; BWRT  $p = 0.021$  compared to *5-HT<sub>2A</sub>-Gal4/+*,  $p = 0.034$  compared to *UAS-hid,rpr/+*). Appetitive olfactory learning and memory did not differ among the three tested genotypes (Fig 3E; KWT  $p = 0.606$ ). Repetition of the experiments with increased sample size gave rise to the same results (S4 Fig).

In summary, we thus conclude that *5-HT<sub>1A</sub><sup>-</sup>*, *5-HT<sub>1B</sub><sup>-</sup>*, and *5-HT<sub>7</sub>-Gal4* positive cells were not necessary for appetitive and aversive olfactory learning and memory. Yet, for *5-HT<sub>2A</sub>-Gal4* we got a different result; unlike appetitive olfactory learning and memory, aversive olfactory learning and memory was impaired.

### *5-HT<sub>2A</sub>* receptor function throughout development is necessary for aversive olfactory learning and memory

To investigate if the memory impairment seen for *5-HT<sub>2A</sub>-Gal4/UAS-hid,rpr* experimental larvae was due to changes in the *5-HT<sub>2A</sub>* receptor function, we next tested a homozygous hypomorphic *5-HT<sub>2A</sub>* receptor mutant. In detail, Nichols [21] showed via quantitative real-time PCR analysis for this line that *5-HT<sub>2A</sub>* expression is reduced by about 90% compared to wild type (*Oregon-R*) and *w<sup>1118</sup>* flies.

Homozygous *5-HT<sub>2A</sub>* mutant larvae showed a similar reduction for aversive olfactory learning and memory when compared to wild-type control (*WT CS*) larvae (Fig 4B; WRT  $p = 0.001$ ). Again, the behavioral phenotype was specific for aversive olfactory learning and memory and did not affect appetitive olfactory learning and memory (Fig 4C; WRT  $p = 1.000$  compared to *WT CS*). In addition, we performed control experiments with *5-HT<sub>2A</sub>* mutant and *WT CS* larvae to test for proper olfactory and gustatory chemotaxis. This was necessary to

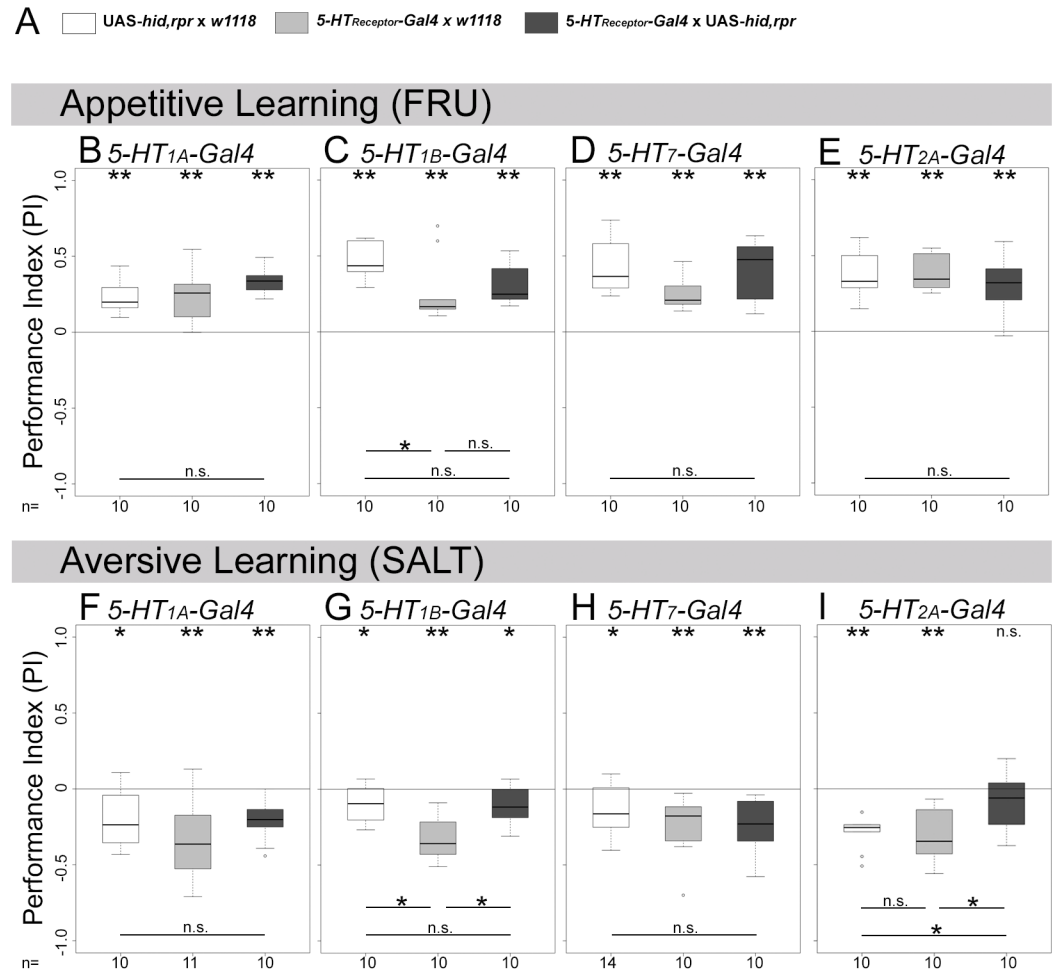

**Fig 3. Ablation of potential  $5\text{-HT}_{2A}$  receptor cells throughout development impairs aversive olfactory learning and memory.**  $5\text{-HT}_{1A}$ ,  $5\text{-HT}_{1B}$ ,  $5\text{-HT}_7$ , and  $5\text{-HT}_{2A}\text{-Gal4}$  lines were crossed with  $\text{UAS-hid,rpr}$  to genetically induce apoptosis in potential 5-HT receptor cells. In addition,  $\text{Gal4}$  lines and  $\text{UAS-hid,rpr}$  were crossed with  $w^{1118}$  to obtain heterozygous genetic control larvae. (A) provides a color scheme for the three different groups used in each experiment. Appetitive olfactory learning and memory using fructose reinforcement is shown at the top (B-E). Aversive olfactory learning and memory is shown at the bottom (F-I). In most cases, experimental larvae and genetic control groups behaved similar. However, ablation of  $5\text{-HT}_{2A}\text{-Gal4}$  positive cells specifically impaired aversive olfactory learning and memory (I), while leaving appetitive olfactory learning and memory intact (E). Sample size ( $n = 10\text{--}14$ ) is indicated at the bottom of each box plot. Differences against zero are given at the top of each box plot. Differences between all three groups or individual groups are shown at the bottom of the panel. Visualization of statistical evaluations: if only n.s. is shown the initial Kruskal-Wallis test (KWT) did not suggest for a difference between the three groups ( $p > 0.05$ ). When differences between each group are shown this provides the results of the Wilcoxon rank-sum tests with Bonferroni corrections (BWRT) as the initial KWT suggested for significance ( $p < 0.05$ ). \*\*\* ( $p < 0.001$ ), \*\* ( $p < 0.01$ ), \* ( $p < 0.05$ ), n.s. (not significant  $p \geq 0.05$ ).

<https://doi.org/10.1371/journal.pone.0181865.g003>

exclude perturbing defects in task-relevant sensory-motor abilities.  $5\text{-HT}_{2A}$  receptor mutants displayed olfactory AM and BA preferences as well as gustatory SALT and FRU preferences that did not significantly differ from wild type controls (Fig 4D, 4E, 4F and 4G; WRT  $p = 0.173$ ,  $p = 0.154$ ,  $p = 0.148$ ,  $p = 0.516$ , respectively).

Based on these results we conclude that  $5\text{-HT}_{2A}$  receptor function throughout development is necessary for aversive olfactory learning and memory using high salt concentration as a unconditioned stimulus.

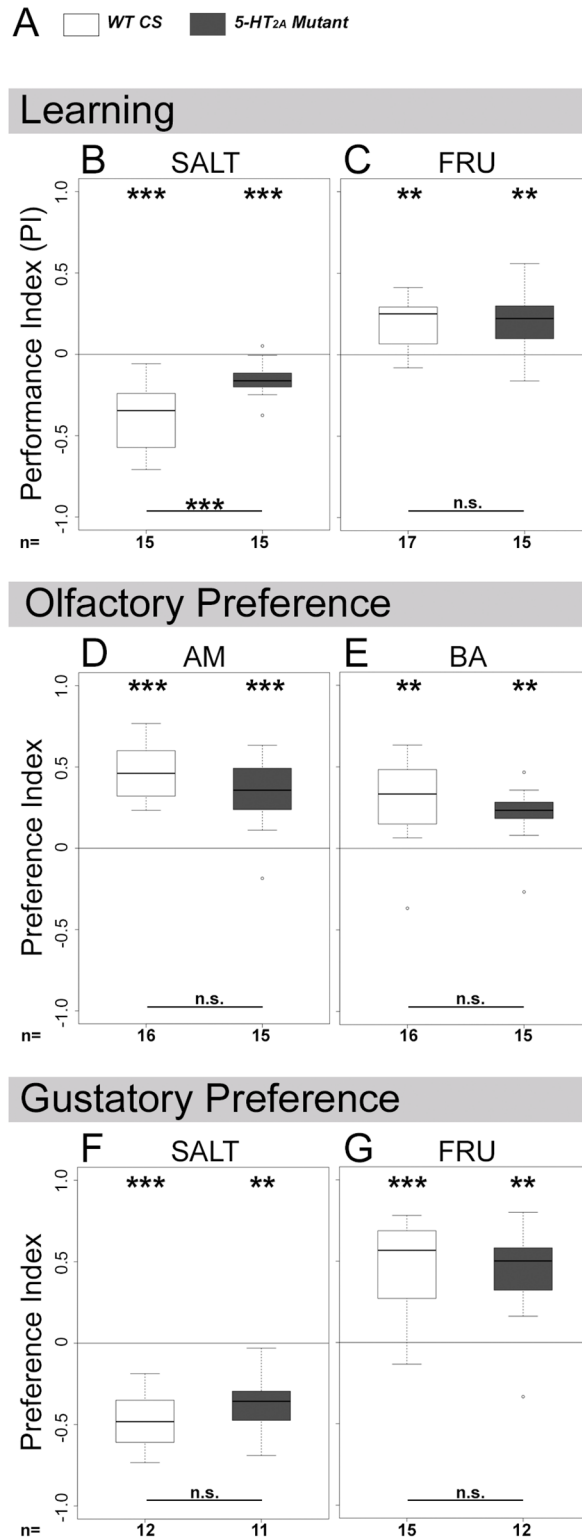

**Fig 4. Impaired 5-HT<sub>2A</sub> receptor function throughout development impairs aversive olfactory learning and memory.** Homozygous 5-HT<sub>2A</sub> receptor gene mutants and wild-type control larvae (*WT CS*) were used to analyze aversive (B) and appetitive (C) olfactory learning and memory, olfactory amyl acetate (AM, in D) and benzaldehyde (BA in E) preferences and gustatory sodium chloride (SALT, in F) and fructose (FRU, in G) preferences. (A) provides a color scheme for the two different groups used in each experiment. Whereas

mutant larvae showed olfactory and gustatory preferences as well as appetitive olfactory learning and memory comparable to WT CS larvae, aversive olfactory learning and memory was significantly reduced. Sample size (n = 11–17) is indicated at the bottom of each box plot. Differences against zero are given at the top of each box plot. Differences between mutant and wild type larvae are shown at the bottom of the panel. \*\*\* (p < 0.001), \*\* (p < 0.01), \* (p < 0.05), n.s. (not significant p ≥ 0.05).

<https://doi.org/10.1371/journal.pone.0181865.g004>

## Ablation of the 5-HT/5-HT<sub>2A</sub> receptor system throughout development specifically impairs aversive odor-salt learning and memory

In an earlier study we had shown that larvae lacking 5-HT cells are able to establish an association between an odor and a punishing stimulus [48]. At first sight the behavioral phenotypes shown in Figs 3I and 4B, therefore, appear to be contradictory. Yet, in our initial experiments we used electric shock instead of high salt concentration as unconditioned stimulus. Thus, it is possible that manipulation of the 5-HT system does not affect aversive olfactory learning and memory in general but is rather restricted to gustatory high salt concentration. To investigate whether this is the case we utilized the same approach as used in Huser et al. (2012). We crossed the *TRH-Gal4* line [78] that expresses in most of the larval 5-HT cells (Fig 5A; [48]) as the *tryptophan hydroxylase* (*TRH*) gene was reported to catalyse the rate-limiting step of 5-HT synthesis from tryptophan to 5-hydroxy-tryptophan [1]. Experimental *TRH-Gal4/UAS-hid,rpr* larvae having most of their 5-HT cells ablated throughout development [48] did not show aversive odor-salt learning and memory (Fig 5B; WST p = 0.762). The behavior was different from both genetic controls (Fig 5B; KWT p = 0.002; BWRT p = 0.002 compared to *TRH-Gal4/+*, p = 0.038 compared to *UAS-hid,rpr/+*). The specificity for the unconditioned stimulus is further supported by a second experiment. Also *5-HT<sub>2A</sub>-Gal4/UAS-hid,rpr* experimental larvae that received odor-electric shock training performed similar as genetic controls and were not impaired in learning and memory (Fig 5C and 5D; KWT p = 0.470). We thus conclude that 5-HT/5-HT<sub>2A</sub> receptor signaling throughout development is necessary for aversive olfactory learning and memory reinforced by high salt concentration.

## Acute blockage of neuronal output of 5-HT and 5-HT<sub>2A</sub> receptor cells does not impair odor-salt learning and memory

To address if 5-HT function is acutely required for odor-salt learning and memory we used the temperature-sensitive dominant negative form of dynamin *UAS-shibire<sup>ts</sup>* (*shi<sup>ts</sup>*) [53]. Thereby, we specifically disrupted synaptic vesicle recycling during training and testing but not during development.

An acute block of neurotransmission of *5-HT<sub>2A</sub>-Gal4* and *TRH-Gal4* positive cells did not affect odor-salt learning and memory (Fig 6C and 6D; WST p = 0.001 and p = 0.020). For both experiments we did not observe a difference between the three particular genotypes (Fig 6C and 6D; KWT p = 0.414 and p = 0.655).

In addition, experimental larvae were tested for olfactory AM and BA preferences and gustatory SALT preference. *5-HT<sub>2A</sub>-Gal4/UAS-shi<sup>ts</sup>* were attracted by both odors (Fig 6E and 6G; WST p = 0.001 and p = 0.048) and avoided SALT (Fig 6I; WST p = 0.033). For all experiments there was no difference between experimental and control larvae (Fig 6E, 6G and 6I; KWT p = 0.560, KWT p = 0.660, KWT p = 0.127, respectively). The same results were observed with *TRH-Gal4* (Fig 6F, 6H and 6J; KWT p = 0.017; BWRT p = 0.029 compared to *TRH-Gal4/+*, p = 0.622 compared to *UAS-shi<sup>ts</sup>/+*; KWT p = 0.597, KWT p = 0.251, respectively). We thus conclude that acute blockage of neurotransmission of the 5-HT signaling system did not affect odor-salt learning and memory reinforced by high salt concentration as well as tested naïve chemosensory preferences.

*TRH-Gal4*

A Expression pattern

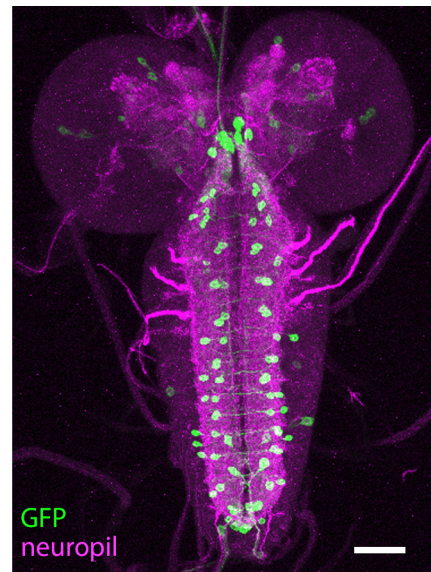

B Aversive Learning (SALT)

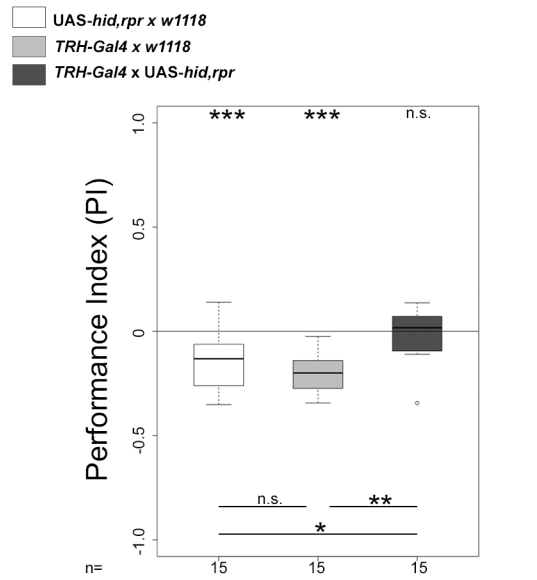

*5-HT<sub>2A</sub>-Gal4*

C Protocol (E-Shock)

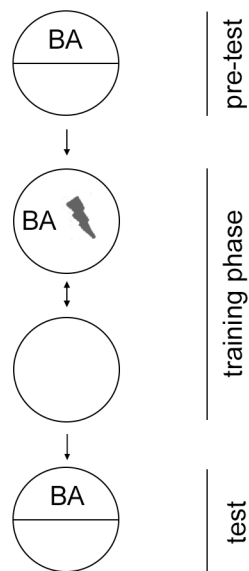

D Aversive Learning (E-Shock)

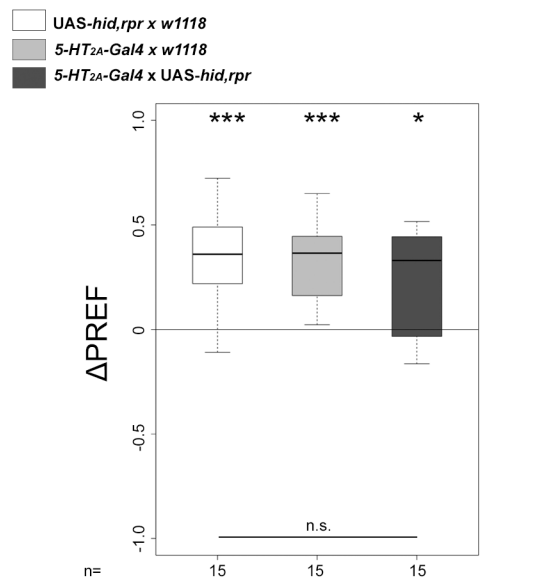

**Fig 5. 5-HT/5-HT<sub>2A</sub> signaling throughout development specifically impairs odor-salt learning and memory.** (A) The *TRH-Gal4* line was crossed with *UAS-mCD8::GFP* to visualize its expression pattern (green; anti-GFP staining) in addition to a reference labeling of the CNS (magenta; anti-ChAT/anti-FasII double-staining). (B) The *TRH-Gal4* line was crossed with *UAS-hid,rpr* to genetically induce apoptosis in 5-HT cells. In addition, the *Gal4* line and *UAS-hid,rpr* were crossed with *w<sup>1118</sup>* to obtain heterozygous genetic control larvae. Above the panel a color scheme describes the three different groups used in the experiment. Ablation of 5-HT cells completely abolished aversive olfactory learning and memory reinforced by high salt concentration. (C) shows an overview on the experimental procedure that was used in larvae to test for odor-electric shock learning and memory. (D) Ablation of *5-HT<sub>2A</sub>-Gal4* positive cells via *UAS-hid,rpr* did not impair

odor-electric shock learning and memory. Sample size ( $n = 15$ ) is indicated at the bottom of each box plot. Differences against zero are given at the top of each box plot. Differences between the groups are shown at the bottom of the panel. Visualization of statistical evaluations: if only n.s. is shown the initial KWT did not suggest for a difference between the three groups ( $p > 0.05$ ). When differences between each group are shown this provides the results of the BWRT as the initial KWT suggested for significance ( $p < 0.05$ ). \*\*\* ( $p < 0.001$ ), \*\* ( $p < 0.01$ ), \* ( $p < 0.05$ ), n.s. (not significant  $p \geq 0.05$ ). Scale bar: 50  $\mu\text{m}$ .

<https://doi.org/10.1371/journal.pone.0181865.g005>

## Discussion

### Ablation of 5-HT/5-HT<sub>2A</sub> receptor signaling during development impairs aversive olfactory learning and memory reinforced by high salt concentration

Serotonin is a biogenic amine, an important neuroactive molecule within the CNS of several insect species. Serotonin, dopamine, histamine, octopamine, and tyramine are amines which have been extensively studied in *Drosophila* (reviewed in [1, 79, 80]). Each one of the five aminergic neuronal systems—including the serotonergic system—exhibits a stereotypic pattern of a small number of neurons that are widely distributed in the larval and adult CNS [1]. Aminergic neurons have attracted much attention in recent years. Thus, the detailed anatomy and various behavioral functions for many aminergic neurons were identified—in numerous cases even at single cell resolution (only focusing on the *Drosophila* larvae: [48, 57, 58, 62, 81]).

In contrast, much less is known on the receptor side. Due to the lack of specific antibodies and genetic tools to anatomically describe and functionally manipulate aminergic receptor cells only limited access and insight is given. Further, similar to vertebrates, for each amine different receptor genes were identified that in turn often couple to different signaling pathways and thereby provide a substrate for complex multi-dimensional functions (reviewed in [1, 82]). This complexity is additionally complicated by differences in the nomenclature (5-HT<sub>7</sub> or 5-HT<sub>7Dro</sub> was also called 5-HT-dro1; 5-HT<sub>1A</sub> or 5-HT<sub>1ADro</sub> was also called 5-HT-dro2A [10]) and the identification of new receptor genes (5-HT<sub>2B</sub> was only recently described [13]).

In this study we used state of the art *Gal4* lines to anatomically describe and functionally evaluate the role of 5-HT<sub>1A</sub>, 5-HT<sub>1B</sub>, 5-HT<sub>2A</sub>, and 5-HT<sub>7</sub> receptor cells with respect to larval chemosensory behaviors [21–23, 26, 27, 29–32, 71]. Due to the lack of specific antibodies this approach is limited as it is not possible to validate the correctness of each *Gal4* expression pattern. We found that putative 5-HT/5-HT<sub>2A</sub> receptor signaling during development is necessary for odor-salt learning and memory. The finding is based on three mutually supportive results. First, ablation of potential 5-HT<sub>2A</sub> receptor cells throughout development specifically impairs odor-salt learning and memory (Fig 3). Second, 5-HT<sub>2A</sub> receptor mutant larvae show the same impairment specifically for odor-salt learning and memory (Fig 4). Third, ablation of 5-HT cells throughout development abolishes specifically odor-salt learning and memory (Fig 5), while leaving appetitive odor-sugar and aversive odor-electric-shock learning and memory intact [48]. Thereby, we describe for the first time a potential involvement of the 5-HT system in larval nervous system development underlying learning and memory. The mode of action, however, of the putative 5-HT/5-HT<sub>2A</sub> receptor signaling is related to the development of the animal and independent of an acute neuronal function (Fig 6).

### 5-HT and 5-HT<sub>2A</sub> receptor cells are dispensable for most of the chemosensory behaviors tested

In addition, we found that potential 5-HT<sub>1A</sub>, 5-HT<sub>1B</sub>, and 5-HT<sub>7</sub> receptor cells are not necessary for any of the tested chemosensory behaviors (Fig 3, S1 and S2 Figs). However, given the

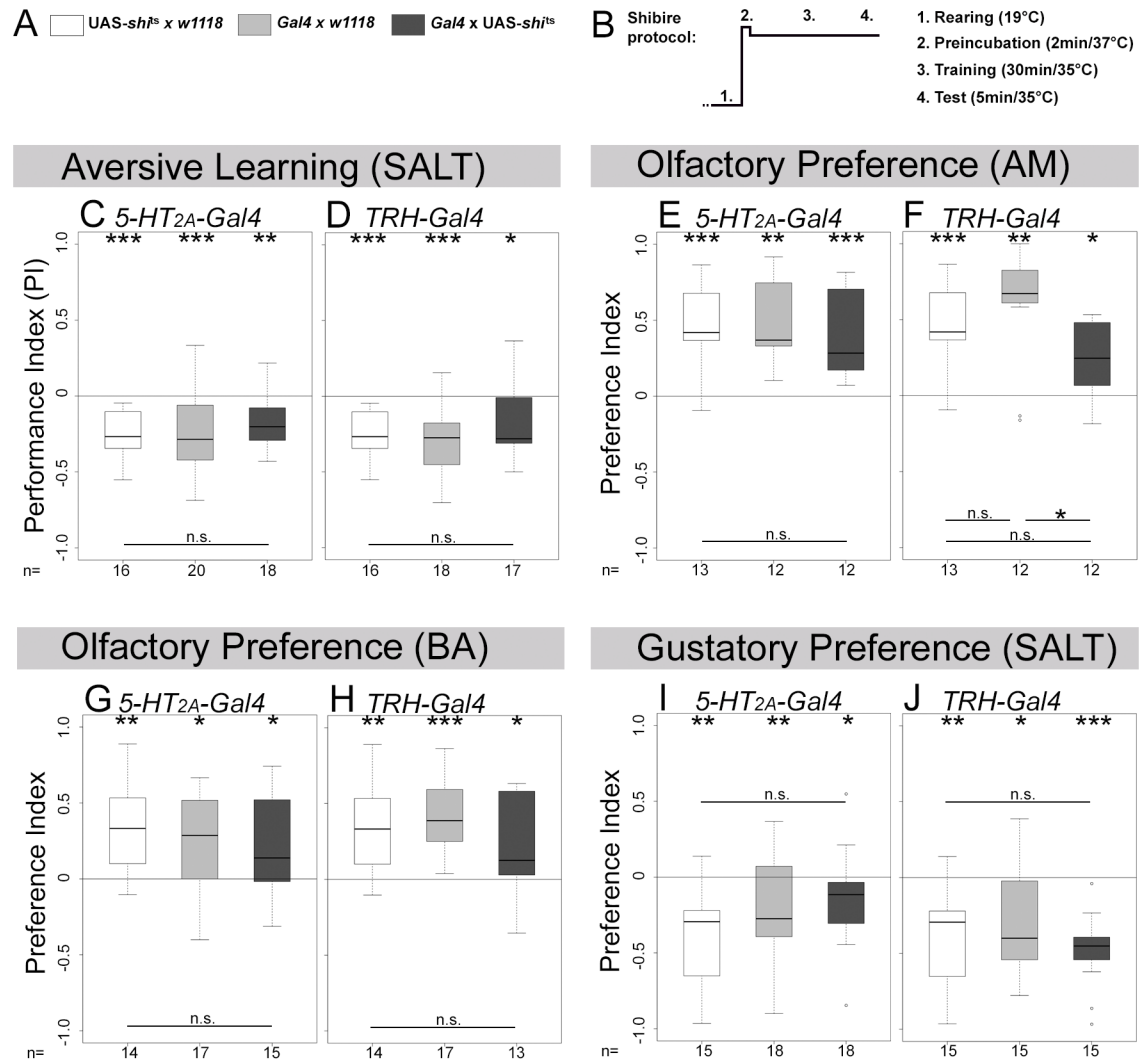

**Fig 6. Acute blockage of synaptic output of 5-HT cells and potential 5-HT<sub>2A</sub> receptor cells does not affect chemosensory behavior.** The *5-HT<sub>2A</sub>-Gal4* and *TRH-Gal4* lines were crossed with *UAS-shi<sup>TS</sup>* to genetically interfere with synaptic transmission only during training and testing but not during development. In addition, the *Gal4* lines and *UAS-hid*, *rpr* were crossed with *w<sup>1118</sup>* to obtain heterozygous genetic control larvae. (A) provides a color scheme for the different groups used in each experiment. (B) shows the temperature regime that was applied to block synaptic output at the restrictive temperature of 35°C specifically during training (30 min) and testing (5 min). Immediately before the experiment, larvae were incubated (2 min) in a water-bath at 37°C. Aversive olfactory learning and memory reinforced by high salt concentration (C and D), olfactory preferences for AM and BA (E–H) and gustatory preferences for SALT (I and J) were analyzed. In none of the cases experimental larvae behaved significantly different compared to both genetic control groups. We thus reason that blockage of synaptic output of 5-HT cells and *5-HT<sub>2A</sub>-Gal4* positive cells does not impair all tested chemosensory behaviors. Sample size (n = 12–18) is indicated at the bottom of each box plot. Differences against zero are given at the top of each box plot. Differences between all three groups or individual groups are shown at the bottom of the panel, except for SALT, where it is placed above the box plots. Visualization of statistical evaluations: if only n.s. is shown the initial KWT did not suggest for a difference between the three groups (p > 0.05). When differences between each group are shown this provides the results of the BWRT as the initial KWT suggested for significance (p < 0.05). \*\*\* (p < 0.001), \*\* (p < 0.01), \* (p < 0.05), n.s. (not significant p ≥ 0.05).

<https://doi.org/10.1371/journal.pone.0181865.g006>

missing verification for each of the three *Gal4* lines expression patterns this result has to be interpreted carefully. Moreover, *5-HT<sub>2A</sub>* receptor cells were not required for olfactory and gustatory preferences and appetitive olfactory learning and memory (Fig 3, S1, S2, S3 and S4 Figs). Overall, it is remarkable that the obtained behavioral phenotypes are limited, particularly



as several studies revealed that 5-HT receptors are essential for different aspects of larval behavior. For locomotion, for instance, *5-HT<sub>1B</sub>* function was required within a small set of abdominal leucokinin positive neurons to suppress rearing [71]. RNAi-dependent knock-down of *5-HT<sub>1B</sub>*, *5-HT<sub>2A</sub>*, and *5-HT<sub>7</sub>* receptors within the MB Kenyon cells increased the distance larvae crawled within 140 seconds [32]. Furthermore, *5-HT<sub>2A</sub>* and *5-HT<sub>7</sub>* receptor mutant larvae showed a reduced number of body-wall contractions [31]. Thus, it seems that larval locomotion requires the entire set of 5-HT receptors within the CNS to organize different aspects of the motor program. Nevertheless, 5-HT receptor function is not limited to locomotion. Pan-neuronal overexpression of *5-HT<sub>1A</sub>*, but not *5-HT<sub>1B</sub>*, *5-HT<sub>2A</sub>*, and *5-HT<sub>7</sub>*, increased the time larvae spend in the light [33]. In addition, *5-HT<sub>2A</sub>* mutants and pan-neuronal knock-down of *5-HT<sub>2A</sub>* reduces larval feeding [13]. This means that individual 5-HT receptors are also important for different kinds of larval behavior. For *5-HT<sub>2A</sub>* this at least includes locomotion, feeding, and odor-salt learning and memory. Future work needs to address whether different sets of cells regulate distinct behavioral outputs or if a single set of cells has multiple functions. Interestingly, in our hands genetic interference with 5-HT receptor function did not affect olfactory and gustatory preferences nor appetitive olfactory learning and memory (Fig 3, S1, S2, S3 and S4 Figs). Thus, defects in certain aspects of locomotion did not prevent larvae from making chemosensory choices, at least within the test interval of 5 minutes that we have applied. Loss or knock-down of 5-HT receptor function does not completely compromise larval crawling and therefore still allows larvae to orientate within their chemosensory environment over longer time periods. In the future, recently established automated locomotion tracking techniques can be implemented that allow to reconstruct and evaluate larval runs and turns with high spatial and temporal resolution [83–87]. This will allow to evaluate if 5-HT receptor function is necessary for immediate chemosensory responses or if particular aspects of the chemosensory behavioral output are changed (for example turn rate and run distance).

Interestingly, although *5-HT<sub>2A</sub>* function is required for feeding [13], larvae with missing *5-HT<sub>2A</sub>* cells or reduced *5-HT<sub>2A</sub>* expression are able to associate an odor with a food reward (Figs 3 and 4 and S4 Fig). This might suggest that at least two different systems process gustatory information in the larval CNS: one pathway modulates feeding and depends on 5-HT function, a second pathway is important for appetitive learning and memory and independent of 5-HT and its receptors. Indeed, it was shown that 5-HT function affects all feeding related motor patterns, including head tilting, mouth hook movement, and pharyngeal and esophagus movements [73, 88]. Whether the processing of the sweetness and/or the nutritional value of sugars contributes differently to these proposed pathways is not clear [45]. A similar dual system was recently also found for the processing of bitter quinine [89].

### The developmental effect of 5-HT/*5-HT<sub>2A</sub>* receptor signaling is specific for odor-salt learning and memory

We have shown that 5-HT cells and *5-HT<sub>2A</sub>* receptor function is necessary for odor-salt learning and memory during development. During learning olfactory stimuli are sensed by only 21 olfactory receptor neurons, which are housed in a single sensillum at the head of the larva, the dorsal organ [90–95]. The olfactory information from a given olfactory receptor neuron is further conveyed by 21 uniglomerular and 14 multiglomerular projection neurons from the AL to the lateral horn and the CA region of the MB [93, 96–99]. Here, intrinsic MB Kenyon cells provide a substrate for synaptic plasticity as olfactory information converges with gustatory reward and punishment signals from different sets of dopaminergic neurons [57, 62, 100, 101].

Further downstream only a limited number of about two dozen MB output neurons [70] transfer the information onto premotor centers to trigger learned behavior.

Given that 5-HT cells and 5-HT<sub>2A</sub> receptor function is dispensable for appetitive olfactory learning and memory (Figs 3 and 4 and S4 Fig) and given that 5-HT cells [48] as well as 5-HT<sub>2A</sub>-Gal4 positive cells (Fig 5) are not necessary for aversive odor-electric shock learning and memory, we assume that 5-HT/5-HT<sub>2A</sub> receptor signaling is specifically necessary for salt reinforcement processing. Otherwise, due to the overlapping neuronal circuits (including the olfactory circuit, the mushroom body, and the premotor and motor centers), more general impairments in learning and memory would have occurred.

Where in the reinforcing pathway does 5-HT/5-HT<sub>2A</sub> receptor signaling become effective? Unfortunately, very little is known about the neuronal pathways signaling aversive salt reinforcement. In *Drosophila* larvae there is no evidence for direct 5-HT input onto the MB [48]. In adults, however, 5-HT positive neurons innervate the MB lobes and CA, termed DPM (dorsal paired medial) and CSD (contralaterally projecting serotonin-immunoreactive deutocerebral) neuron [102, 103]. Yet, the DPM neuron is not present at the larval stage [70] and the CSD neuron only innervates both AL and the lateral protocerebrum but misses the adult specific innervation of the CA and lateral horn [103].

Instead, 5-HT<sub>2A</sub>-Gal4 line expression nearly exclusively innervates the SOG (Fig 1). Most of the innervation comes from cells having their somata outside the CNS. Unfortunately, due to technical limitations we were not able to clearly localize them. However, TRH-Gal4 has a pronounced expression within the SOG (Fig 5 [48]). Thus, although we favor the hypothesis that 5-HT/5-HT<sub>2A</sub> receptor signaling, which is necessary for salt reinforcement can be attributed to the SOG, future work is needed for validation. In addition, we cannot exclude that the 5-HT<sub>2A</sub> receptor Gal4 expression pattern may be misleading, given that we were able to show that acute blockage of 5-HT/5-HT<sub>2A</sub> receptor neurotransmission does not impair odor-salt learning and memory (Fig 6). Thus, neuromodulatory or developmental processes may underlie 5-HT/5-HT<sub>2A</sub> receptor function. Indeed, 5-HT<sub>2A</sub> receptor gene expression pattern markedly changes over larval development [21]. Therefore, it is possible that the impairment of odor-salt learning and memory is based on cellular functions, which are no longer included in the expression pattern of third instar larvae that we used for our analysis. This renders a localization of the cellular effects rather difficult.

## 5-HT and 5-HT<sub>2A</sub> receptor signaling regulate developmental processes

Before adopting their roles as neurotransmitters in the mature CNS, neuroactive substances function in the establishment of neural networks [104]. This is also true for 5-HT that can serve as a neurotransmitter and a neuromodulator in all animal phyla studied (reviewed in [105]). In vertebrates it was shown that 5-HT modulates different developmental events, including neuronal migration, cell differentiation, and synaptogenesis (reviewed in [106]). In invertebrates 5-HT regulates—among other processes—cell division in mollusca and the development of the AL during metamorphosis in moths [107, 108]. For *Drosophila* larvae it was shown that dopa decarboxylase mutants that are devoid of 5-HT and dopamine increase the extent of branching of 5-HT projections to the proventriculus and midgut, similar to larvae in which neuronal 5-HT synthesis was constitutively knocked-down [76, 109]. In addition, constitutively knocked-down 5-HT synthesis showed an increased number and size of varicosities in 5-HT fiber projections to the proventriculus [76]. This kind of autoregulation for the organization of 5-HT varicosities was also described in the larval CNS in 5-HT neurons of the A7 segment of the abdominal ganglion [76, 110].

Developmental functions of 5-HT signaling are not limited to larval stages but also include embryonic development. High levels of 5-HT<sub>2A</sub> receptor expression occur already at 3 hours of embryonic development and match with the seven-stripe pattern of the pair-rule gene *Fushi tarazu* [16]. 5-HT signaling through the 5-HT<sub>2A</sub> receptor triggers changes in cell adhesiveness that are necessary for normal germband extension during gastrulation [111, 112].

In summary, there is good evidence that 5-HT/5-HT<sub>2A</sub> receptor signaling serves several developmental functions, including the regulation of neuronal connectivity in addition to their classic role in synaptic transmission. Future work needs to address how this might affect unconditioned stimulus processing using high salt concentration. In the longer run this may uncover 5-HT dependent organizational principles of reinforcement processing shared with adult *Drosophila* and other insects.

## Supporting information

### S1 Fig. Ablation of potential 5-HT receptor cells does not alter olfactory preferences

**towards four different odors.** 5-HT<sub>1A</sub><sup>-</sup>, 5-HT<sub>1B</sub><sup>-</sup>, 5-HT<sub>7</sub><sup>-</sup>, and 5-HT<sub>2A</sub><sup>-</sup>*Gal4* lines were crossed with UAS-*hid,rpr* to genetically induce apoptosis in potential 5-HT receptor cells. In addition, *Gal4* lines and UAS-*hid,rpr* were crossed with *w<sup>1118</sup>* to obtain heterozygous genetic control larvae. (A) provides a color scheme for the three different groups used in each experiment. Naïve olfactory preferences for amyl acetate (AM, in B, C, D, E), benzaldehyde (BA, in F, G, H, I), heptanol (HEP, in J, K, L, M), and nonanol (NON, in N, O, P, Q) were analyzed. In none of the cases experimental larvae behaved significantly different from both genetic control groups. We thus reason that ablation of potential 5-HT receptor cells does not impair the ability of the larvae to detect olfactory cues. The sample size (n = 11–16) is indicated under each box plot. Differences against random distribution are given at the top of each box plot. Differences between all three groups or individual groups are shown at the bottom of the panel. \*\*\* (p < 0.001), \*\* (p < 0.01), \* (p < 0.05), n.s. (not significant p ≥ 0.05). (TIF)

### S2 Fig. Ablation of potential 5-HT receptor cells does not alter gustatory preferences towards four different tastants.

5-HT<sub>1A</sub><sup>-</sup>, 5-HT<sub>1B</sub><sup>-</sup>, 5-HT<sub>7</sub><sup>-</sup>, and 5-HT<sub>2A</sub><sup>-</sup>*Gal4* lines were crossed with UAS-*hid,rpr* to genetically induce apoptosis in potential 5-HT receptor cells. In addition, *Gal4* lines and UAS-*hid,rpr* were crossed with *w<sup>1118</sup>* to obtain heterozygous genetic control larvae. (A) provides a color scheme for the three different groups used in each experiment. Naïve gustatory preferences for sodium chloride (SALT, in B, C, D, E), fructose (FRU, in F, G, H, I), arabinose (ARA, in J, K, L, M), and sorbitol (SOR, in N, O, P, Q) were analyzed. In none of the cases experimental larvae behaved significantly different to both genetic control groups. We thus reason that ablation of potential 5-HT receptor cells does not impair the ability of the larvae to detect gustatory stimuli. Sample size (n = 13–20) is indicated under each box plot. Differences against random distribution are given at the top of each panel. Differences between all three groups or individual groups are shown at the bottom of the panel, except for SALT, where it is placed above the box plots. \*\*\* (p < 0.001), \*\* (p < 0.01), \* (p < 0.05), n.s. (not significant p ≥ 0.05). (TIF)

**S3 Fig. Ablation of potential 5-HT<sub>2A</sub> receptor cells does not alter gustatory preferences towards 1.5 M sodium chloride.** 5-HT<sub>2A</sub><sup>-</sup>*Gal4* was crossed with UAS-*hid,rpr* to genetically induce apoptosis in potential 5-HT<sub>2A</sub> receptor cells. In addition, the *Gal4* line and UAS-*hid,rpr* were crossed with *w<sup>1118</sup>* to obtain heterozygous genetic control larvae. Naïve gustatory preferences for 1.5 M sodium chloride (SALT) was analyzed. Experimental larvae behaved at the

same level as both genetic control groups. We thus reason that ablation of potential 5-HT<sub>2A</sub> receptor cells does not impair the ability of the larvae to detect 1.5 M sodium chloride. Sample size (n = 15) is indicated under each box plot. Differences against random distribution are given at the top of each panel. Differences between all three groups or individual groups are shown above the box plots. n.s. indicates that the initial KWT did not suggest for a difference between the three groups (p > 0.05). \*\*\* (p < 0.001), \*\* (p < 0.01), n.s. (not significant p ≥ 0.05).  
(TIF)

**S4 Fig. Ablation of potential 5-HT<sub>2A</sub> receptor cells throughout development impairs aversive olfactory learning and memory.** 5-HT<sub>2A</sub>-Gal4 was crossed with UAS-*hid,rpr* to genetically induce apoptosis in potential 5-HT<sub>2A</sub> receptor cells. In addition, the Gal4 line and UAS-*hid,rpr* were crossed with *w<sup>1118</sup>* to obtain heterozygous genetic control larvae. (A) provides a color scheme for the three different groups used in each experiment. (B) Appetitive olfactory learning and memory using fructose reinforcement is shown at the top. (C) Aversive olfactory learning and memory is shown at the bottom. (B) For appetitive olfactory learning experimental larvae and genetic control groups behaved similar. Yet, ablation of 5-HT<sub>2A</sub>-Gal4 positive cells throughout development specifically impaired aversive olfactory learning and memory (C). Sample size (n = 17–20) is indicated at the bottom of each box plot. Differences against zero are given at the top of each box plot. Differences between all three groups or individual groups are shown at the bottom of the panel. Visualization of statistical evaluations: if only n.s. is shown the initial KWT did not suggest for a difference between the three groups (p ≥ 0.05). When differences between each group are shown this provides the results of the BWRT as the initial KWT suggested for significance (p > 0.05). \*\*\* (p < 0.001), \*\* (p < 0.01), \* (p < 0.05), n.s. (not significant p ≥ 0.05).  
(TIF)

**S1 Table. Raw data behavior.**

(XLSX)

**S1 File. Supplemental material and methods.**

(PDF)

**S2 File. Movie 1: 5-HT<sub>1A</sub>-GAL4 expression.**

(AVI)

**S3 File. Movie 2: 5-HT<sub>1A</sub>-GAL4 expression (GFP).**

(AVI)

**S4 File. Movie 3: 5-HT<sub>1B</sub>-GAL4 expression.**

(AVI)

**S5 File. Movie 4: 5-HT<sub>1B</sub>-GAL4 expression (GFP).**

(AVI)

**S6 File. Movie 5: 5-HT<sub>7</sub>-GAL4 expression.**

(AVI)

**S7 File. Movie 6: 5-HT<sub>7</sub>-GAL4 expression (GFP).**

(AVI)

**S8 File. Movie 7: 5-HT<sub>2A</sub>-GAL4 expression.**

(AVI)

**S9 File. Movie 8: 5-HT<sub>2A</sub>-GAL4 expression (dsRed).**  
(AVI)

## Acknowledgments

We thank Margarete Ehrenfried for fly care and maintenance. We thank Tilman Triphan, Wolf Hütteroth, Dennis Pauls, and William Collins for comments on the manuscript. In addition, we thank Annekathrin Widmann, Anna Rist, and Astrid Rohwedder for technical advises. The anatomical analyses were supported by the Bioimaging Facility of the University of Konstanz. This work was supported by the Deutsche Forschungsgemeinschaft (TH1584/1–1 and TH1584/3-1 to A.S.T.), the Swiss National Science Foundation (31003A132812/1 to A.S.T.), the Baden Württemberg Stiftung (to A.S.T.), the Bioimaging Center and Zukunftkolleg of the University of Konstanz (to A.S.T.). A.H. is supported by the International Max Planck Research School for Organismal Biology.

## Author Contributions

**Conceptualization:** Annina Huser, Andreas S. Thum.

**Data curation:** Annina Huser, Melanie Eschment, Nazli Güllü, Katharina A. N. Collins, Kathrin Böpple, Lyubov Pankevych, Emilia Rolsing.

**Formal analysis:** Annina Huser, Andreas S. Thum.

**Funding acquisition:** Andreas S. Thum.

**Investigation:** Annina Huser, Melanie Eschment, Nazli Güllü, Katharina A. N. Collins, Kathrin Böpple, Lyubov Pankevych, Emilia Rolsing, Andreas S. Thum.

**Methodology:** Annina Huser, Andreas S. Thum.

**Project administration:** Andreas S. Thum.

**Resources:** Andreas S. Thum.

**Supervision:** Andreas S. Thum.

**Validation:** Andreas S. Thum.

**Visualization:** Annina Huser, Andreas S. Thum.

**Writing – original draft:** Annina Huser, Andreas S. Thum.

**Writing – review & editing:** Annina Huser, Andreas S. Thum.

## References

1. Monastirioti M. Biogenic amine systems in the fruit fly *Drosophila melanogaster*. Microscopy research and technique. 1999; 45(2):106–21. Epub 1999/05/20. [https://doi.org/10.1002/\(SICI\)1097-0029\(19990415\)45:2<106::AID-JEMT5>3.0.CO;2-3](https://doi.org/10.1002/(SICI)1097-0029(19990415)45:2<106::AID-JEMT5>3.0.CO;2-3) PMID: 10332728.
2. Zhang X, Gaudry Q. Functional integration of a serotonergic neuron in the *Drosophila* antennal lobe. eLife. 2016; 5. Epub 2016/08/31. <https://doi.org/10.7554/eLife.16836> PMID: 27572257;
3. Dacks AM, Green DS, Root CM, Nighorn AJ, Wang JW. Serotonin modulates olfactory processing in the antennal lobe of *Drosophila*. Journal of neurogenetics. 2009; 23(4):366–77. <https://doi.org/10.3109/01677060903085722> PMID: 19863268;
4. Alekseyenko OV, Lee C, Kravitz EA. Targeted manipulation of serotonergic neurotransmission affects the escalation of aggression in adult male *Drosophila melanogaster*. PloS one. 2010; 5(5):e10806. Epub 2010/06/04. <https://doi.org/10.1371/journal.pone.0010806> PMID: 20520823;

5. Alekseyenko OV, Chan YB, Fernandez MP, Bulow T, Pankratz MJ, Kravitz EA. Single serotonergic neurons that modulate aggression in *Drosophila*. *Current biology: CB*. 2014; 24(22):2700–7. <https://doi.org/10.1016/j.cub.2014.09.051> PMID: 25447998;
6. Pooryasin A, Fiala A. Identified Serotonin-Releasing Neurons Induce Behavioral Quiescence and Suppress Mating in *Drosophila*. *The Journal of neuroscience: the official journal of the Society for Neuroscience*. 2015; 35(37):12792–812. <https://doi.org/10.1523/JNEUROSCI.1638-15.2015> PMID: 26377467.
7. Neckameyer WS, Coleman CM, Eadie S, Goodwin SF. Compartmentalization of neuronal and peripheral serotonin synthesis in *Drosophila melanogaster*. *Genes, brain, and behavior*. 2007; 6(8):756–69. Epub 2007/03/23. <https://doi.org/10.1111/j.1601-183X.2007.00307.x> PMID: 17376153.
8. Ro J, Pak G, Malec PA, Lyu Y, Allison DB, Kennedy RT, et al. Serotonin signaling mediates protein valuation and aging. *eLife*. 2016; 5. Epub 2016/08/31. <https://doi.org/10.7554/eLife.16843> PMID: 27572262;
9. Kamyshev NG, Smirnova GP, Savvateeva EV, Medvedeva AV, Ponomarenko VV. The influence of serotonin and p-chlorophenylalanine on locomotor activity of *Drosophila melanogaster*. *Pharmacology, biochemistry, and behavior*. 1983; 18(5):677–81. Epub 1983/05/01. PMID: 6222385.
10. Tierney AJ. Structure and function of invertebrate 5-HT receptors: a review. *Comparative biochemistry and physiology Part A, Molecular & integrative physiology*. 2001; 128(4):791–804. Epub 2001/04/03. PMID: 11282322.
11. Barnes NM, Sharp T. A review of central 5-HT receptors and their function. *Neuropharmacology*. 1999; 38(8):1083–152. [http://dx.doi.org/10.1016/S0028-3908\(99\)00010-6](http://dx.doi.org/10.1016/S0028-3908(99)00010-6). PMID: 10462127
12. Hoyer D, Hannon JP, Martin GR. Molecular, pharmacological and functional diversity of 5-HT receptors. *Pharmacology, biochemistry, and behavior*. 2002; 71(4):533–54. Epub 2002/03/13. PMID: 11888546.
13. Gasque G, Conway S, Huang J, Rao Y, Vosshall LB. Small molecule drug screening in *Drosophila* identifies the 5HT2A receptor as a feeding modulation target. *Scientific reports*. 2013; 3:srep02120. Epub 2013/07/03. <https://doi.org/10.1038/srep02120> PMID: 23817146;
14. Witz P, Amlaiky N, Plassat JL, Maroteaux L, Borrelli E, Hen R. Cloning and characterization of a *Drosophila* serotonin receptor that activates adenylate cyclase. *Proceedings of the National Academy of Sciences of the United States of America*. 1990; 87(22):8940–4. Epub 1990/11/01. PMID: 2174167;
15. Saudou F, Boschert U, Amlaiky N, Plassat JL, Hen R. A family of *Drosophila* serotonin receptors with distinct intracellular signalling properties and expression patterns. *The EMBO journal*. 1992; 11(1):7–17. Epub 1992/01/01. PMID: 1310937;
16. Colas JF, Launay JM, Kellermann O, Rosay P, Maroteaux L. *Drosophila* 5-HT<sub>2</sub> serotonin receptor: coexpression with fushi-tarazu during segmentation. *Proceedings of the National Academy of Sciences of the United States of America*. 1995; 92(12):5441–5. Epub 1995/06/06. PMID: 7777527;
17. Hauser F, Cazzamali G, Williamson M, Blenau W, Grimmelikhuijzen CJ. A review of neurohormone GPCRs present in the fruitfly *Drosophila melanogaster* and the honey bee *Apis mellifera*. *Progress in neurobiology*. 2006; 80(1):1–19. Epub 2006/10/31. <https://doi.org/10.1016/j.pneurobio.2006.07.005> PMID: 17070981.
18. Blenau W, Thamm M. Distribution of serotonin (5-HT) and its receptors in the insect brain with focus on the mushroom bodies: lessons from *Drosophila melanogaster* and *Apis mellifera*. *Arthropod structure & development*. 2011; 40(5):381–94. Epub 2011/01/29. <https://doi.org/10.1016/j.asd.2011.01.004> PMID: 21272662.
19. Yuan Q, Lin F, Zheng X, Sehgal A. Serotonin modulates circadian entrainment in *Drosophila*. *Neuron*. 2005; 47(1):115–27. Epub 2005/07/06. <https://doi.org/10.1016/j.neuron.2005.05.027> PMID: 15996552.
20. Yuan Q, Joiner WJ, Sehgal A. A sleep-promoting role for the *Drosophila* serotonin receptor 1A. *Current biology: CB*. 2006; 16(11):1051–62. Epub 2006/06/07. <https://doi.org/10.1016/j.cub.2006.04.032> PMID: 16753559.
21. Nichols CD. 5-HT<sub>2</sub> receptors in *Drosophila* are expressed in the brain and modulate aspects of circadian behaviors. *Developmental neurobiology*. 2007; 67(6):752–63. <https://doi.org/10.1002/dneu.20370> PMID: 17443822.
22. Kahsai L, Carlsson MA, Winther AM, Nassel DR. Distribution of metabotropic receptors of serotonin, dopamine, GABA, glutamate, and short neuropeptide F in the central complex of *Drosophila*. *Neuroscience*. 2012; 208:11–26. Epub 2012/03/01. <https://doi.org/10.1016/j.neuroscience.2012.02.007> PMID: 22361394.
23. Becnel J, Johnson O, Luo J, Nassel DR, Nichols CD. The serotonin 5-HT<sub>7</sub>Dro receptor is expressed in the brain of *Drosophila*, and is essential for normal courtship and mating. *PloS one*. 2011; 6(6): e20800. Epub 2011/06/16. <https://doi.org/10.1371/journal.pone.0020800> PMID: 21674056;

24. Sizemore TR, Dacks AM. Serotonergic Modulation Differentially Targets Distinct Network Elements within the Antennal Lobe of *Drosophila melanogaster*. *Scientific reports*. 2016; 6:37119. Epub 2016/11/16. <https://doi.org/10.1038/srep37119> PMID: 27845422;
25. Johnson O, Becnel J, Nichols CD. Serotonin 5-HT(2) and 5-HT(1A)-like receptors differentially modulate aggressive behaviors in *Drosophila melanogaster*. *Neuroscience*. 2009; 158(4):1292–300. Epub 2008/12/02. <https://doi.org/10.1016/j.neuroscience.2008.10.055> PMID: 19041376;
26. Liu Y, Luo J, Carlsson MA, Nassel DR. Serotonin and insulin-like peptides modulate leucokinin-producing neurons that affect feeding and water homeostasis in *Drosophila*. *The Journal of comparative neurology*. 2015; 523(12):1840–63. Epub 2015/03/04. <https://doi.org/10.1002/cne.23768> PMID: 25732325.
27. Johnson O, Becnel J, Nichols CD. Serotonin receptor activity is necessary for olfactory learning and memory in *Drosophila melanogaster*. *Neuroscience*. 2011; 192:372–81. Epub 2011/07/14. <https://doi.org/10.1016/j.neuroscience.2011.06.058> PMID: 21749913;
28. Lee PT, Lin HW, Chang YH, Fu TF, Dubnau J, Hirsh J, et al. Serotonin-mushroom body circuit modulating the formation of anesthesia-resistant memory in *Drosophila*. *Proceedings of the National Academy of Sciences of the United States of America*. 2011; 108(33):13794–9. Epub 2011/08/03. <https://doi.org/10.1073/pnas.1019483108> PMID: 21808003;
29. Luo J, Becnel J, Nichols CD, Nassel DR. Insulin-producing cells in the brain of adult *Drosophila* are regulated by the serotonin 5-HT1A receptor. *Cellular and molecular life sciences: CMLS*. 2012; 69(3):471–84. Epub 2011/08/06. <https://doi.org/10.1007/s00018-011-0789-0> PMID: 21818550;
30. Majeed ZR, Stacy A, Cooper RL. Pharmacological and genetic identification of serotonin receptor subtypes on *Drosophila* larval heart and aorta. *Journal of comparative physiology B, Biochemical, systemic, and environmental physiology*. 2014; 184(2):205–19. Epub 2013/12/29. <https://doi.org/10.1007/s00360-013-0795-7> PMID: 24370737.
31. Majeed ZR, Abdeljaber E, Soveland R, Cornwell K, Bankemper A, Koch F, et al. Modulatory Action by the Serotonergic System: Behavior and Neurophysiology in *Drosophila melanogaster*. *Neural plasticity*. 2016; 2016:7291438. Epub 2016/03/19. <https://doi.org/10.1155/2016/7291438> PMID: 26989517;
32. Silva B, Goles NI, Varas R, Campusano JM. Serotonin receptors expressed in *Drosophila* mushroom bodies differentially modulate larval locomotion. *PloS one*. 2014; 9(2):e89641. Epub 2014/03/04. <https://doi.org/10.1371/journal.pone.0089641> PMID: 24586928;
33. Rodriguez Moncalvo VG, Campos AR. Role of serotonergic neurons in the *Drosophila* larval response to light. *BMC neuroscience*. 2009; 10:66. Epub 2009/06/25. <https://doi.org/10.1186/1471-2202-10-66> PMID: 19549295;
34. Shimada-Niwa Y, Niwa R. Serotonergic neurons respond to nutrients and regulate the timing of steroid hormone biosynthesis in *Drosophila*. *Nature communications*. 2014; 5:5778. Epub 2014/12/17. <https://doi.org/10.1038/ncomms6778> PMID: 25502946;
35. Duffy JB. GAL4 system in *Drosophila*: a fly geneticist's Swiss army knife. *Genesis (New York, NY: 2000)*. 2002; 34(1–2):1–15. Epub 2002/09/27. <https://doi.org/10.1002/gene.10150> PMID: 12324939.
36. Brand AH, Perrimon N. Targeted gene expression as a means of altering cell fates and generating dominant phenotypes. *Development (Cambridge, England)*. 1993; 118(2):401–15. Epub 1993/06/01. PMID: 8223268.
37. Venken KJ, Simpson JH, Bellen HJ. Genetic manipulation of genes and cells in the nervous system of the fruit fly. *Neuron*. 2011; 72(2):202–30. Epub 2011/10/25. <https://doi.org/10.1016/j.neuron.2011.09.021> PMID: 22017985;
38. Gerber B, Stocker RF. The *Drosophila* larva as a model for studying chemosensation and chemosensory learning: a review. *Chem Senses*. 2007; 32(1):65–89. <https://doi.org/10.1093/chemse/bjl030> PMID: 17071942.
39. Apostolopoulou AA, Widmann A, Rohwedder A, Pfitzenmaier JE, Thum AS. Appetitive associative olfactory learning in *Drosophila* larvae. *Journal of visualized experiments: JoVE*. 2013;(72). <https://doi.org/10.3791/4334> PMID: 23438816.
40. Gerber B, Stocker RF, Tanimura T, Thum AS. Smelling, tasting, learning: *Drosophila* as a study case. Results and problems in cell differentiation. 2009; 47:139–85. [https://doi.org/10.1007/400\\_2008\\_9](https://doi.org/10.1007/400_2008_9) PMID: 19145411.
41. Schleyer M, Saumweber T, Nahrendorf W, Fischer B, von Alpen D, Pauls D, et al. A behavior-based circuit model of how outcome expectations organize learned behavior in larval *Drosophila*. *Learn Mem*. 2011; 18(10):639–53. <https://doi.org/10.1101/lm.2163411> PMID: 21946956.
42. Scherer S, Stocker RF, Gerber B. Olfactory learning in individually assayed *Drosophila* larvae. *Learn Mem*. 2003; 10(3):217–25. <https://doi.org/10.1101/lm.57903> PMID: 12773586;

43. Gerber B, Hendel T. Outcome expectations drive learned behaviour in larval *Drosophila*. *Proceedings Biological sciences / The Royal Society*. 2006; 273(1604):2965–8. <https://doi.org/10.1098/rspb.2006.3673> PMID: 17015355;
44. Aceves-Pina EO, Quinn WG. Learning in normal and mutant *Drosophila* larvae. *Science (New York, NY)*. 1979; 206(4414):93–6. <https://doi.org/10.1126/science.206.4414.93> PMID: 17812455.
45. Rohwedder A, Pfitzenmaier JE, Ramsperger N, Apostolopoulou AA, Widmann A, Thum AS. Nutritional value-dependent and nutritional value-independent effects on *Drosophila melanogaster* larval behavior. *Chem Senses*. 2012; 37(8):711–21. <https://doi.org/10.1093/chemse/bjs055> PMID: 22695795.
46. Honjo K, Furukubo-Tokunaga K. Induction of cAMP response element-binding protein-dependent medium-term memory by appetitive gustatory reinforcement in *Drosophila* larvae. *The Journal of neuroscience: the official journal of the Society for Neuroscience*. 2005; 25(35):7905–13. Epub 2005/09/02. <https://doi.org/10.1523/jneurosci.2135-05.2005> PMID: 16135747.
47. Honjo K, Furukubo-Tokunaga K. Distinctive neuronal networks and biochemical pathways for appetitive and aversive memory in *Drosophila* larvae. *The Journal of neuroscience: the official journal of the Society for Neuroscience*. 2009; 29(3):852–62. Epub 2009/01/23. <https://doi.org/10.1523/jneurosci.1315-08.2009> PMID: 19158309.
48. Huser A, Rohwedder A, Apostolopoulou AA, Widmann A, Pfitzenmaier JE, Maiolo EM, et al. The serotonergic central nervous system of the *Drosophila* larva: anatomy and behavioral function. *PLoS one*. 2012; 7(10):e47518. Epub 2012/10/20. <https://doi.org/10.1371/journal.pone.0047518> PMID: 23082175;
49. Bellen HJ, Levis RW, Liao G, He Y, Carlson JW, Tsang G, et al. The BDGP gene disruption project: single transposon insertions associated with 40% of *Drosophila* genes. *Genetics*. 2004; 167(2):761–81. Epub 2004/07/09. <https://doi.org/10.1534/genetics.104.026427> PMID: 15238527;
50. Hacker U, Nystedt S, Barmchi MP, Horn C, Wimmer EA. piggyBac-based insertional mutagenesis in the presence of stably integrated P elements in *Drosophila*. *Proceedings of the National Academy of Sciences of the United States of America*. 2003; 100(13):7720–5. Epub 2003/06/13. <https://doi.org/10.1073/pnas.1230526100> PMID: 12802016;
51. Abbott MK, Lengyel JA. Embryonic head involution and rotation of male terminalia require the *Drosophila* locus head involution defective. *Genetics*. 1991; 129(3):783–9. PMID: 1752422;
52. White K, Tahaoglu E, Steller H. Cell killing by the *Drosophila* gene reaper. *Science (New York, NY)*. 1996; 271(5250):805–7. Epub 1996/02/09. PMID: 8628996.
53. Kitamoto T. Conditional modification of behavior in *Drosophila* by targeted expression of a temperature-sensitive shibire allele in defined neurons. *Journal of neurobiology*. 2001; 47(2):81–92. Epub 2001/04/06. PMID: 11291099.
54. Lee T, Luo L. Mosaic analysis with a repressible cell marker for studies of gene function in neuronal morphogenesis. *Neuron*. 1999; 22(3):451–61. Epub 1999/04/10. PMID: 10197526.
55. Chen Y, Akin O, Nern A, Tsui CY, Pecot MY, Zipursky SL. Cell-type-specific labeling of synapses in vivo through synaptic tagging with recombination. *Neuron*. 2014; 81(2):280–93. Epub 2014/01/28. <https://doi.org/10.1016/j.neuron.2013.12.021> PMID: 24462095;
56. Pfeiffer BD, Jenett A, Hammonds AS, Ngo TT, Misra S, Murphy C, et al. Tools for neuroanatomy and neurogenetics in *Drosophila*. *Proceedings of the National Academy of Sciences of the United States of America*. 2008; 105(28):9715–20. Epub 2008/07/16. <https://doi.org/10.1073/pnas.0803697105> PMID: 18621688;
57. Selcho M, Pauls D, Han KA, Stocker RF, Thum AS. The role of dopamine in *Drosophila* larval classical olfactory conditioning. *Plos One*. 2009; 4(6):e5897. <https://doi.org/10.1371/journal.pone.0005897> PMID: 19521527;
58. Selcho M, Pauls D, Huser A, Stocker RF, Thum AS. Characterization of the octopaminergic and tyramineric neurons in the central brain of *Drosophila* larvae. *The Journal of comparative neurology*. 2014. Epub 2014/04/23. <https://doi.org/10.1002/cne.23616> PMID: 24752702.
59. Schipanski A, Yarali A, Niewalda T, Gerber B. Behavioral analyses of sugar processing in choice, feeding, and learning in larval *Drosophila*. *Chemical senses*. 2008; 33(6):563–73. Epub 2008/05/31. <https://doi.org/10.1093/chemse/bjn024> PMID: 18511478;
60. Niewalda T, Singhal N, Fiala A, Saumweber T, Wegener S, Gerber B. Salt processing in larval *Drosophila*: choice, feeding, and learning shift from appetitive to aversive in a concentration-dependent way. *Chem Senses*. 2008; 33(8):685–92. <https://doi.org/10.1093/chemse/bjn037> PMID: 18640967;
61. Rohwedder A, Selcho M, Chassot B, Thum AS. Neuropeptide F neurons modulate sugar reward during associative olfactory learning of *Drosophila* larvae. *The Journal of comparative neurology*. 2015; 523(18):2637–64. Epub 2015/08/04. <https://doi.org/10.1002/cne.23873> PMID: 26234537.



62. Rohwedder A, Wenz NL, Stehle B, Huser A, Yamagata N, Zlatić M, et al. Four Individually Identified Paired Dopamine Neurons Signal Reward in Larval *Drosophila*. *Current biology: CB*. 2016; 26(5):661–9. Epub 2016/02/16. <https://doi.org/10.1016/j.cub.2016.01.012> PMID: 26877086.
63. Nassif C, Noveen A, Hartenstein V. Early development of the *Drosophila* brain: III. The pattern of neuropile founder tracts during the larval period. *J Comp Neurol*. 2003; 455(4):417–34. <https://doi.org/10.1002/cne.10482> PMID: 12508317.
64. Colomb J, Grillenzoni N, Ramaekers A, Stocker RF. Architecture of the primary taste center of *Drosophila melanogaster* larvae. *J Comp Neurol*. 2007; 502(5):834–47. <https://doi.org/10.1002/cne.21312> PMID: 17436288.
65. Matz MV, Fradkov AF, Labas YA, Savitsky AP, Zaraisky AG, Markelov ML, et al. Fluorescent proteins from nonbioluminescent Anthozoa species. *Nature biotechnology*. 1999; 17(10):969–73. <https://doi.org/10.1038/13657> PMID: 10504696
66. Kubala MH, Kovtun O, Alexandrov K, Collins BM. Structural and thermodynamic analysis of the GFP: GFP-nanobody complex. *Protein science: a publication of the Protein Society*. 2010; 19(12):2389–401. Epub 2010/10/15. <https://doi.org/10.1002/pro.519> PMID: 20945358;
67. Webb CM, Cameron EM, Sundberg JP. Fluorescence-labeled reporter gene in transgenic mice provides a useful tool for investigating cutaneous innervation. *Veterinary pathology*. 2012; 49(4):727–30. Epub 2011/07/23. <https://doi.org/10.1177/0300985811414033> PMID: 21778516;
68. Horn C, Jaunich B, Wimmer EA. Highly sensitive, fluorescent transformation marker for *Drosophila* transgenesis. *Development genes and evolution*. 2000; 210(12):623–9. Epub 2001/01/11. PMID: 11151299.
69. Berghammer AJ, Klingler M, Wimmer EA. A universal marker for transgenic insects. *Nature*. 1999; 402(6760):370–1. Epub 1999/12/10. <https://doi.org/10.1038/46463> PMID: 10586872.
70. Pauls D, Selcho M, Gendre N, Stocker RF, Thum AS. *Drosophila* larvae establish appetitive olfactory memories via mushroom body neurons of embryonic origin. *J Neurosci*. 2010; 30(32):10655–66. <https://doi.org/10.1523/JNEUROSCI.1281-10.2010> PMID: 20702697.
71. Okusawa S, Kohsaka H, Nose A. Serotonin and downstream leucokinin neurons modulate larval turning behavior in *Drosophila*. *The Journal of neuroscience: the official journal of the Society for Neuroscience*. 2014; 34(7):2544–58. Epub 2014/02/14. <https://doi.org/10.1523/jneurosci.3500-13.2014> PMID: 24523545.
72. Hofbauer A, Campos-Ortega JA. Proliferation pattern and early differentiation of the optic lobes in *Drosophila melanogaster*. *Roux's archives of developmental biology*. 1990; 198(5):264–74. <https://doi.org/10.1007/BF00377393> PMID: 28305665
73. Schoofs A, Hucklesfeld S, Surendran S, Pankratz MJ. Serotonergic pathways in the *Drosophila* larval enteric nervous system. *Journal of insect physiology*. 2014; 69:118–25. Epub 2014/06/08. <https://doi.org/10.1016/j.jinsphys.2014.05.022> PMID: 24907674.
74. Pineyro G, Blier P. Autoregulation of serotonin neurons: role in antidepressant drug action. *Pharmacol Rev*. 1999; 51(3):533–91. PMID: 10471417.
75. Chen J, Condrón BG. Branch architecture of the fly larval abdominal serotonergic neurons. *Developmental biology*. 2008; 320(1):30–8. Epub 2008/06/20. <https://doi.org/10.1016/j.ydbio.2008.03.038> PMID: 18561908;
76. Neckameyer WS. A trophic role for serotonin in the development of a simple feeding circuit. *Developmental neuroscience*. 2010; 32(3):217–37. Epub 2010/08/18. <https://doi.org/10.1159/000304888> PMID: 20714156.
77. Burke CJ, Huetteroth W, Oswald D, Perisse E, Krashes MJ, Das G, et al. Layered reward signalling through octopamine and dopamine in *Drosophila*. *Nature*. 2012; 492(7429):433–7. Epub 2012/10/30. <https://doi.org/10.1038/nature11614> PMID: 23103875;
78. Sitaraman D, LaFerriere H, Birman S, Zars T. Serotonin is critical for rewarded olfactory short-term memory in *Drosophila*. *Journal of neurogenetics*. 2012; 26(2):238–44. Epub 2012/03/23. <https://doi.org/10.3109/01677063.2012.666298> PMID: 22436011.
79. Nall A, Sehgal A. Monoamines and sleep in *Drosophila*. *Behavioral neuroscience*. 2014; 128(3):264–72. Epub 2014/06/03. <https://doi.org/10.1037/a0036209> PMID: 24886188.
80. Blenau W. Cellular actions of biogenic amines. *Archives of insect biochemistry and physiology*. 2005; 59(3):99–102. <https://doi.org/10.1002/arch.20072> PMID: 15986381.
81. Selcho M, Pauls D, El Jundi B, Stocker RF, Thum AS. The role of octopamine and tyramine in *Drosophila* larval locomotion. *J Comp Neurol*. 2012; 520(16):3764–85. <https://doi.org/10.1002/cne.23152> PMID: 22627970.
82. Blenau W, Baumann A. Molecular and pharmacological properties of insect biogenic amine receptors: lessons from *Drosophila melanogaster* and *Apis mellifera*. *Archives of insect biochemistry*

- and physiology. 2001; 48(1):13–38. Epub 2001/08/24. <https://doi.org/10.1002/arch.1055> PMID: 11519073.
83. Gomez-Marin A, Partoune N, Stephens GJ, Louis M, Brembs B. Automated tracking of animal posture and movement during exploration and sensory orientation behaviors. *PLoS one*. 2012; 7(8):e41642. Epub 2012/08/23. <https://doi.org/10.1371/journal.pone.0041642> PMID: 22912674;
  84. Risse B, Thomas S, Otto N, Lopmeier T, Valkov D, Jiang X, et al. FIM, a novel FTIR-based imaging method for high throughput locomotion analysis. *PLoS one*. 2013; 8(1):e53963. Epub 2013/01/26. <https://doi.org/10.1371/journal.pone.0053963> PMID: 23349775;
  85. Berh D, Risse B, Michels T, Otto N, Jiang X, Klambt C. A FIM-based Long-Term in-vial Monitoring System for *Drosophila* Larvae. *IEEE transactions on bio-medical engineering*. 2016. Epub 2016/11/17. <https://doi.org/10.1109/tbme.2016.2628203> PMID: 27849522.
  86. Gershow M, Berck M, Mathew D, Luo L, Kane EA, Carlson JR, et al. Controlling airborne cues to study small animal navigation. *Nature methods*. 2012; 9(3):290–6. Epub 2012/01/17. <https://doi.org/10.1038/nmeth.1853> PMID: 22245808;
  87. Ohyama T, Jovanic T, Denisov G, Dang TC, Hoffmann D, Kerr RA, et al. High-throughput analysis of stimulus-evoked behaviors in *Drosophila* larva reveals multiple modality-specific escape strategies. *Plos One*. 2013; 8(8):e71706. <https://doi.org/10.1371/journal.pone.0071706> PMID: 23977118;
  88. Schoofs A, Huckesfeld S, Schlegel P, Miroshnikow A, Peters M, Zeymer M, et al. Selection of motor programs for suppressing food intake and inducing locomotion in the *Drosophila* brain. *PLoS biology*. 2014; 12(6):e1001893. Epub 2014/06/25. <https://doi.org/10.1371/journal.pbio.1001893> PMID: 24960360;
  89. Apostolopoulou AA, Mazija L, Wust A, Thum AS. The neuronal and molecular basis of quinine-dependent bitter taste signaling in *Drosophila* larvae. *Frontiers in behavioral neuroscience*. 2014; 8:6. Epub 2014/01/31. <https://doi.org/10.3389/fnbeh.2014.00006> PMID: 24478653;
  90. Singh RN, Singh K. Fine structure of the sensory organs of *Drosophila melanogaster* Meigen larva (Diptera: Drosophilidae). *International Journal of Insect Morphology and Embryology*. 1984; 13(4):255–73. [http://dx.doi.org/10.1016/0020-7322\(84\)90001-1](http://dx.doi.org/10.1016/0020-7322(84)90001-1).
  91. Python F, Stocker RF. Adult-like complexity of the larval antennal lobe of *D. melanogaster* despite markedly low numbers of odorant receptor neurons. *The Journal of comparative neurology*. 2002; 445(4):374–87. Epub 2002/03/29. PMID: 11920714.
  92. Fishilevich E, Domingos AI, Asahina K, Naef F, Vosshall LB, Louis M. Chemotaxis behavior mediated by single larval olfactory neurons in *Drosophila*. *Current biology*: CB. 2005; 15(23):2086–96. Epub 2005/12/08. <https://doi.org/10.1016/j.cub.2005.11.016> PMID: 16332533.
  93. Berck ME, Khandelwal A, Claus L, Hernandez-Nunez L, Si G, Tabone CJ, et al. The wiring diagram of a glomerular olfactory system. *eLife*. 2016; 5. <https://doi.org/10.7554/eLife.14859> PMID: 27177418.
  94. Kreher SA, Kwon JY, Carlson JR. The molecular basis of odor coding in the *Drosophila* larva. *Neuron*. 2005; 46(3):445–56. Epub 2005/05/11. <https://doi.org/10.1016/j.neuron.2005.04.007> PMID: 15882644.
  95. Oppliger FY, P MG, Vlimant M. Neurophysiological and behavioural evidence for an olfactory function for the dorsal organ and a gustatory one for the terminal organ in *Drosophila melanogaster* larvae. *Journal of insect physiology*. 2000; 46(2):135–44. Epub 2003/05/29. PMID: 12770245.
  96. Ramaekers A, Magnenat E, Marin EC, Gendre N, Jefferis GS, Luo L, et al. Glomerular maps without cellular redundancy at successive levels of the *Drosophila* larval olfactory circuit. *Current biology*: CB. 2005; 15(11):982–92. Epub 2005/06/07. <https://doi.org/10.1016/j.cub.2005.04.032> PMID: 15936268.
  97. Masuda-Nakagawa LM, Gendre N, O’Kane CJ, Stocker RF. Localized olfactory representation in mushroom bodies of *Drosophila* larvae. *Proceedings of the National Academy of Sciences of the United States of America*. 2009; 106(25):10314–9. <https://doi.org/10.1073/pnas.0900178106> PMID: 19502424;
  98. Thum AS, Leisibach B, Gendre N, Selcho M, Stocker RF. Diversity, variability, and suboesophageal connectivity of antennal lobe neurons in *D. melanogaster* larvae. *J Comp Neurol*. 2011; 519(17):3415–32. <https://doi.org/10.1002/cne.22713> PMID: 21800296.
  99. Masuda-Nakagawa LM, Awasaki T, Ito K, O’Kane CJ. Targeting expression to projection neurons that innervate specific mushroom body calyx and antennal lobe glomeruli in larval *Drosophila*. *Gene Expr Patterns*. 2010; 10(7–8):328–37. <https://doi.org/10.1016/j.gep.2010.07.004> PMID: 20659588.
  100. Widmann A, Artinger M, Biesinger L, Boepple K, Peters C, Schlechter J, et al. Genetic Dissection of Aversive Associative Olfactory Learning and Memory in *Drosophila* Larvae. *PLoS genetics*. 2016; 12(10):e1006378. Epub 2016/10/22. <https://doi.org/10.1371/journal.pgen.1006378> PMID: 27768692;

101. Schroll C, Riemensperger T, Bucher D, Ehmer J, Voller T, Erbguth K, et al. Light-induced activation of distinct modulatory neurons triggers appetitive or aversive learning in *Drosophila* larvae. *Current biology: CB*. 2006; 16(17):1741–7. <https://doi.org/10.1016/j.cub.2006.07.023> PMID: 16950113.
102. Waddell S, Armstrong JD, Kitamoto T, Kaiser K, Quinn WG. The amnesiac gene product is expressed in two neurons in the *Drosophila* brain that are critical for memory. *Cell*. 2000; 103(5):805–13. Epub 2000/12/15. PMID: 11114336.
103. Roy B, Singh AP, Shetty C, Chaudhary V, North A, Landgraf M, et al. Metamorphosis of an identified serotonergic neuron in the *Drosophila* olfactory system. *Neural development*. 2007; 2:20. Epub 2007/10/26. <https://doi.org/10.1186/1749-8104-2-20> PMID: 17958902;
104. Herlenius E, Lagercrantz H. Neurotransmitters and neuromodulators during early human development. *Early Human Development*. 2001; 65(1):21–37. [http://dx.doi.org/10.1016/S0378-3782\(01\)00189-X](http://dx.doi.org/10.1016/S0378-3782(01)00189-X). PMID: 11520626
105. Buznikov GA, Lambert HW, Lauder JM. Serotonin and serotonin-like substances as regulators of early embryogenesis and morphogenesis. *Cell and tissue research*. 2001; 305(2):177–86. Epub 2001/09/08. PMID: 11545255.
106. Gaspar P, Cases O, Maroteaux L. The developmental role of serotonin: news from mouse molecular genetics. *Nature reviews Neuroscience*. 2003; 4(12):1002–12. Epub 2003/11/18. <https://doi.org/10.1038/nrn1256> PMID: 14618156.
107. Glebov K, Voronezhskaya EE, Khabarova MY, Ivashkin E, Nezhlin LP, Ponimaskin EG. Mechanisms underlying dual effects of serotonin during development of *Helisoma trivolvis* (Mollusca). *BMC developmental biology*. 2014; 14:14. Epub 2014/03/15. <https://doi.org/10.1186/1471-213X-14-14> PMID: 24625099;
108. Oland LA, Kirschenbaum SR, Pott WM, Mercer AR, Tolbert LP. Development of an identified serotonergic neuron in the antennal lobe of the moth and effects of reduction in serotonin during construction of olfactory glomeruli. *Journal of neurobiology*. 1995; 28(2):248–67. Epub 1995/10/01. <https://doi.org/10.1002/neu.480280210> PMID: 8537828.
109. Budnik V, Wu CF, White K. Altered branching of serotonin-containing neurons in *Drosophila* mutants unable to synthesize serotonin and dopamine. *The Journal of neuroscience: the official journal of the Society for Neuroscience*. 1989; 9(8):2866–77. Epub 1989/08/01. PMID: 2570137.
110. Sykes PA, Condron BG. Development and sensitivity to serotonin of *Drosophila* serotonergic varicosities in the central nervous system. *Developmental biology*. 2005; 286(1):207–16. Epub 2005/08/27. <https://doi.org/10.1016/j.ydbio.2005.07.025> PMID: 16122730;
111. Colas JF, Launay JM, Maroteaux L. Maternal and zygotic control of serotonin biosynthesis are both necessary for *Drosophila* germband extension. *Mechanisms of development*. 1999; 87(1–2):67–76. Epub 1999/09/24. PMID: 10495272.
112. Colas JF, Launay JM, Vonesch JL, Hickel P, Maroteaux L. Serotonin synchronises convergent extension of ectoderm with morphogenetic gastrulation movements in *Drosophila*. *Mechanisms of development*. 1999; 87(1–2):77–91. Epub 1999/09/24. PMID: 10495273.
